# Supplementary material for: A Phase 3 Randomized Precision Medicine Clinical Trial Using Low-Dose Ondansetron (a 5-HT3 Antagonist) to Treat Alcohol Use Disorder
Source: Research Square preprint supplement (doi:10.21203/rs.3.rs-3093698/v1), 2023-07-06

**SUPPLEMENTARY INFORMATION**

Contents

SENSITIVITY ANALYSES OF PHDD 4

Model 1A 4

Unstructured Covariance With Adjustment of Baseline PHDD 4

Model 1B 4

Unstructured Covariance Without Adjustment of Baseline PHDD 4

Model 2A 5

Toeplitz Covariance With Adjustment of Baseline PHDD 5

Model 2B 5

Toeplitz Covariance Without Adjustment of Baseline PHDD 5

Model 3A 6

Compound Symmetry Covariance With Adjustment of Baseline PHDD 6

Model 3B 6

Compound Symmetry Covariance Without Adjustment of Baseline PHDD 6

GENOTYPE TESTING OF ALL SUBJECTS 8

ANALYSES WITH FEMALE SUBJECTS STRATIFIED USING <6 DDD OR ≥6 DDD 58

CORRELATIONAL ANALYSES FOR PHDD 67

All Subjects 67

Heavy Drinkers (<10 DDD) 69

Severe Heavy Drinkers (> 10 DDD) 71

[Supplementary Table 1. Unstructured Covariance With Adjustment of Baseline PHDD, AD04 vs. Placebo, Months 5 & 6 Combined and Month 6](#bookmark) 4

[Supplementary Table 2. Unstructured Covariance Without Adjustment of Baseline PHDD, AD04 vs. Placebo, Months 5 & 6 Combined and Month 6](#bookmark1) 5

[Supplementary Table 3. Toeplitz Covariance With Adjustment of Baseline PHDD, AD04 vs. Placebo, Months 5 & 6 Combined and Month 6](#bookmark2) 5

[Supplementary Table 4. Toeplitz Covariance Without Adjustment of Baseline PHDD, AD04 vs. Placebo, Months 5 & 6 Combined and Month 6](#bookmark3) 6

[Supplementary Table 5. Compound Symmetry Covariance With Adjustment of Baseline PHDD, AD04 vs. Placebo, Months 5 & 6 Combined and Month 6](#bookmark4) 6

[Supplementary Table 6. Compound Symmetry Covariance Without Adjustment of Baseline PHDD, AD04 vs. Placebo, Months 5 & 6 Combined and Month 6](#bookmark5) 7

[Supplementary Table 7. Listing of Disposition and Genotype Testing by Subject](#bookmark6) 8

[Supplementary Table 8. SAS ANOVA Table for New Definition of DDD at Randomization](#bookmark7) 56

[Supplementary Table 9. LSM Estimate of Change in PHDD of Months 5 & 6 for New Definition of DDD at Randomization: AD04 vs. Placebo](#bookmark8) 57

[Supplementary Table 10. LSM Estimate of Change in PHDD of Month 5 for New Definition of DDD at Randomization: AD04 vs. Placebo](#bookmark9) 57

[Supplementary Table 11. LSM Estimate of Change in PHDD of Month 6 for New Definition of DDD at Randomization: AD04 vs. Placebo](#bookmark10) 57

[Supplementary Table 12. LSM Estimates of Change in PHDD for New Definition of DDD at Randomization](#bookmark11) 58

[Supplementary Table 13. SAS ANOVA Table for New Definition of DDD at Randomization: Heavy Drinkers](#bookmark12) 59

[Supplementary Table 14. LSM Estimate of Change in PHDD of Months 5 & 6 for New Definiton of DDD at Randomization: AD04 vs. Placebo for Heavy Drinkers](#bookmark13) 59

[Supplementary Table 15. LSM Estimate of Change in PHDD of Month 5 for New Definiton of DDD at Randomization: AD04 vs. Placebo for Heavy Drinkers](#bookmark14) 60

[Supplementary Table 16. LSM Estimate of Change in PHDD of Month 6 for New Definiton of DDD at Randomization: AD04 vs. Placebo for Heavy Drinkers](#bookmark15) 60

[Supplementary Table 17. LSM Estimates of Change in PHDD for New Definition of DDD at Randomization for Heavy Drinkers](#bookmark16) 60

[Supplementary Table 18. SAS ANOVA Table for New Definition of DDD at Randomization: Severe Heavy Drinkers](#bookmark17) 62

[Supplementary Table 19. LSM Estimate of Change in PHDD of Months 5 & 6 for New Definition of DDD at Randomization: AD04 vs. Placebo for Severe Heavy Drinkers](#bookmark18) 62

[Supplementary Table 20. LSM Estimate of Change in PHDD of Month 5 for New Definiton of DDD at Randomization: AD04 vs. Placebo for Severe Heavy Drinkers](#bookmark19) 63

[Supplementary Table 21. LSM Estimate of Change in PHDD of Month 6 for New Definiton of DDD at Randomization: AD04 vs. Placebo for Severe Heavy Drinkers](#bookmark20) 63

[Supplementary Table 22. LSM Estimates of Change in PHDD for New Definiton of DDD at Randomization for Severe Heavy Drinkers](#bookmark21) 63

[Supplementary Figure 1. Correlational Analysis for PHDD, All Subjects](#bookmark22) 65

[Supplementary Figure 2. Correlational Analysis for PHDD by Treatment, All Subjects](#bookmark23) 66

[Supplementary Figure 3. Correlational Analysis for PHDD, Heavy Drinkers](#bookmark24) 67

[Supplementary Figure 4. Correlational Analysis for PHDD by Treatment, Heavy Drinkers](#bookmark25) 68

[Supplementary Figure 5. Correlational Analysis for PHDD, Severe Heavy Drinkers](#bookmark26) 69

[Supplementary Figure 6. Correlational Analysis for PHDD by Treatment, Severe Heavy Drinkers](#bookmark27) 70

# SENSITIVITY ANALYSES OF PHDD

We examined further the sensitivity of the AD04 group vs. the placebo group response on the percentage of heavy drinking days (PHDD) for the subgroup of heavy drinkers to understand whether results would vary by analytic models. We present here 3 different models with each model being in 2 parts (A and B), i.e., with and without baseline PHDD adjustment.

The models showed consistently that the contrast between the AD04 group and the placebo group at Month 6 was significant, irrespective of the models used (p=0.027 to p=0.039). The contrasts between the AD04 group vs. the placebo group at Months 5 and 6 combined were close to significance (p=0.044 to 0.081).

The first model presented is the pre-specified analytic plan using an unstructured covariance with baseline PHDD adjustment.

## Model 1A

### Unstructured Covariance With Adjustment of Baseline PHDD

In that analysis, we did a contrast of the AD04 group vs. the placebo group in the change of PHDD in Months 5 & 6 from baseline. The difference is 7.0% between treatment and placebo, which is marginal but not significant (p=0.070).

The contrast of the AD04 group vs. the placebo group in the change of PHDD at Month 6 from baseline was 8.5%, which was significant (p=0.031).

Supplementary Table 1. Unstructured Covariance With Adjustment of Baseline PHDD, AD04 vs. Placebo, Months 5 & 6 Combined and Month 6

| **Label** | **Estimate** | **Standard Error** | **P Value** |
| --- | --- | --- | --- |
| Months 5 & 6 AD04 vs. Placebo | 6.9798 | 3.8267 | 0.070 |
| Month 6 AD04 vs. Placebo | 8.5166 | 3.9116 | 0.031 |

## Model 1B

### Unstructured Covariance Without Adjustment of Baseline PHDD

When the analysis was repeated without baseline PHDD adjustment, the contrast of the AD04 group vs. the placebo group in the change of PHDD in Months 5 & 6 from baseline was larger than in the model with baseline adjustment at 8.3% and the significance level was p=0.060.

The contrast of the AD04 group vs. the placebo group in the change of PHDD in Month 6 from baseline was 9.9%, which was significant (p=0.028).

Supplementary Table 2. Unstructured Covariance Without Adjustment of Baseline PHDD, AD04 vs. Placebo, Months 5 & 6 Combined and Month 6

| **Label** | **Estimate** | **Standard Error** | **P Value** |
| --- | --- | --- | --- |
| Months 5 & 6 AD04 vs. Placebo | 8.3366 | 4.4034 | 0.060 |
| Month 6 AD04 vs. Placebo | 9.8645 | 4.4536 | 0.028 |

## Model 2A

### Toeplitz Covariance With Adjustment of Baseline PHDD

We conducted a sensitivity analysis, using Toeplitz for the covariance structure.

We did a contrast of the AD04 group vs. the placebo group in the change of PHDD in Months 5 & 6 from baseline. The difference was 7.1% between AD04 and placebo, the difference was not significant (p=0.081).

The contrast of the AD04 group vs. the placebo group in the change of PHDD at Month 6 from baseline was 8.9%, which was significant (p=0.039).

Supplementary Table 3. Toeplitz Covariance With Adjustment of Baseline PHDD, AD04 vs. Placebo, Months 5 & 6 Combined and Month 6

| **Label** | **Estimate** | **Standard Error** | **P Value** |
| --- | --- | --- | --- |
| Months 5 & 6 AD04 vs. Placebo | 7.1203 | 4.0617 | 0.081 |
| Month 6 AD04 vs. Placebo | 8.8595 | 4.2864 | 0.039 |

## Model 2B

### Toeplitz Covariance Without Adjustment of Baseline PHDD

We did a contrast of the AD04 group vs. the placebo group in the change of PHDD in Months 5 & 6 from baseline. The difference is 8.5% between treatment and placebo, which is marginal but not significant (p=0.059).

The contrast of the AD04 group vs. the placebo group in the change of PHDD at Month 6 from baseline was 10.2%, which was significant (p=0.030).

Supplementary Table 4. Toeplitz Covariance Without Adjustment of Baseline PHDD, AD04 vs. Placebo, Months 5 & 6 Combined and Month 6

| **Label** | **Estimate** | **Standard Error** | **P Value** |
| --- | --- | --- | --- |
| Months 5 & 6 AD04 vs. Placebo | 8.5038 | 4.4826 | 0.059 |
| Month 6 AD04 vs. Placebo | 10.2276 | 4.6885 | 0.030 |

## Model 3A

### Compound Symmetry Covariance With Adjustment of Baseline PHDD

We conducted a sensitivity analysis, using compound symmetry for the covariance structure.

The contrast of the AD04 group vs. the placebo group in the change of PHDD in Months 5 & 6 from baseline had a difference of 7.5%, which was marginal but not significant (p=0.059).

The contrast of the AD04 group vs. the placebo group in the change of PHDD at Month 6 from baseline was 9.0%, which was significant (p=0.035).

Supplementary Table 5. Compound Symmetry Covariance With Adjustment of Baseline PHDD, AD04 vs. Placebo, Months 5 & 6 Combined and Month 6

| **Label** | **Estimate** | **Standard Error** | **P Value** |
| --- | --- | --- | --- |
| Months 5 & 6 AD04 vs. Placebo | 7.4730 | 3.9380 | 0.059 |
| Month 6 AD04 vs. Placebo | 8.9996 | 4.2490 | 0.035 |

## Model 3B

### Compound Symmetry Covariance Without Adjustment of Baseline PHDD

We conducted a contrast of the AD04 group vs. the placebo group in the change of PHDD in Months 5 & 6 from baseline. The difference is 8.9% between treatment and placebo, the difference is significant (p=0.044).

The contrast of treatment vs. placebo in the change of PHDD in Month 6 from baseline is 10.4%, which is significant (p=0.027).

Supplementary Table 6. Compound Symmetry Covariance Without Adjustment of Baseline PHDD, AD04 vs. Placebo, Months 5 & 6 Combined and Month 6

| **Label** | **Estimate** | **Standard Error** | **P Value** |
| --- | --- | --- | --- |
| Month 5 & 6 AD04 vs. Placebo | 8.8899 | 4.3902 | 0.044 |
| Month 6 AD04 vs. Placebo | 10.4091 | 4.6709 | 0.027 |

# GENOTYPE TESTING OF ALL SUBJECTS

Supplementary Table 7. Listing of Disposition and Genotype Testing by Subject

| **Country** | **Subject ID** | **Disposition** | **Gene test** | **LL/TT** | **AG** | **GG** | **AC** |
| --- | --- | --- | --- | --- | --- | --- | --- |
| Finland | 10001 | Screening Failure | - |  |  |  |  |
| Finland | 10002 | Screening Failure | - |  |  |  |  |
| Finland | 10003 | Screening Failure | - |  |  |  |  |
| Finland | 10004 | Screening Failure | - |  |  |  |  |
| Finland | 10005 | Screening Failure | - |  |  |  |  |
| Finland | 10006 | Screening Failure | - |  |  |  |  |
| Finland | 10007 | Screening Failure | - |  |  |  |  |
| Finland | 10008 | Early termination | + | X | X |  |  |
| Finland | 10009 | Completed | + |  | X |  |  |
| Finland | 10010 | Screening Failure | - |  |  |  |  |
| Finland | 10011 | Screening Failure | - |  |  |  |  |
| Finland | 10012 | Completed | + | X |  |  |  |
| Finland | 10013 | Screening Failure | - |  |  |  |  |
| Finland | 10014 | Screening Failure | - |  |  |  |  |
| Finland | 10015 | Screening Failure | + | X |  |  |  |
| Finland | 10016 | Screening Failure | - |  |  |  |  |
| Finland | 10017 | Screening Failure | - |  |  |  |  |
| Finland | 10018 | Screening Failure | - |  |  |  |  |
| Finland | 10019 | Screening Failure | ND |  |  |  |  |
| Finland | 10020 | Screening Failure | - |  |  |  |  |
| Finland | 10021 | Completed | + |  | X |  | X |
| Finland | 10022 | Screening Failure | - |  |  |  |  |
| Finland | 10023 | Screening Failure | - |  |  |  |  |
| Finland | 10024 | Screening Failure | - |  |  |  |  |
| Finland | 10025 | Screening Failure | + |  |  | X |  |
| Finland | 10026 | Early termination | + |  | X |  | X |
| Finland | 10027 | Screening Failure | - |  |  |  |  |
| Finland | 10028 | Completed | + |  | X |  |  |
| Finland | 10029 | Screening Failure | + | X |  |  |  |
| Finland | 10030 | Screening Failure | - |  |  |  |  |
| Finland | 10031 | Screening Failure | - |  |  |  |  |
| Finland | 10032 | Screening Failure | - |  |  |  |  |
| Finland | 10033 | Screening Failure | ND |  |  |  |  |
| Finland | 10034 | Screening Failure | ND |  |  |  |  |
| Finland | 10035 | Screening Failure | - |  |  |  |  |
| Finland | 10036 | Screening Failure | ND |  |  |  |  |
| Finland | 10037 | Screening Failure | ND |  |  |  |  |
| Finland | 10038 | Screening Failure | - |  |  |  |  |
| Finland | 10039 | Screening Failure | - |  |  |  |  |
| Finland | 10040 | Screening Failure | ND |  |  |  |  |
| Finland | 10041 | Completed | + | X |  |  |  |
| Finland | 10042 | Screening Failure | - |  |  |  |  |
| Finland | 10043 | Screening Failure | - |  |  |  |  |
| Finland | 10044 | Completed | + | X |  |  |  |
| Finland | 10045 | Screening Failure | - |  |  |  |  |
| Finland | 10046 | Screening Failure | ND |  |  |  |  |
| Finland | 10047 | Screening Failure | ND |  |  |  |  |
| Finland | 10048 | Screening Failure | - |  |  |  |  |
| Finland | 10049 | Screening Failure | ND |  |  |  |  |
| Finland | 10050 | Screening Failure | - |  |  |  |  |
| Finland | 10051 | Screening Failure | ND |  |  |  |  |
| Finland | 10052 | Screening Failure | - |  |  |  |  |
| Finland | 10053 | Screening Failure | - |  |  |  |  |
| Finland | 10054 | Screening Failure | - |  |  |  |  |
| Finland | 10055 | Early termination | + | X |  |  |  |
| Finland | 10056 | Screening Failure | - |  |  |  |  |
| Finland | 10057 | Screening Failure | ND |  |  |  |  |
| Finland | 10058 | Screening Failure | - |  |  |  |  |
| Finland | 10059 | Screening Failure | - |  |  |  |  |
| Finland | 10060 | Screening Failure | - |  |  |  |  |
| Finland | 10061 | Completed | + | X |  |  |  |
| Finland | 10062 | Screening Failure | - |  |  |  |  |
| Finland | 10063 | Screening Failure | - |  |  |  |  |
| Finland | 10064 | Early termination | + |  | X |  | X |
| Finland | 10065 | Screening Failure | - |  |  |  |  |
| Finland | 10066 | Screening Failure | ND |  |  |  |  |
| Finland | 10067 | Screening Failure | - |  |  |  |  |
| Finland | 10068 | Screening Failure | + | X |  |  |  |
| Finland | 10069 | Screening Failure | - |  |  |  |  |
| Finland | 10070 | Screening Failure | ND |  |  |  |  |
| Finland | 10071 | Screening Failure | - |  |  |  |  |
| Finland | 10072 | Screening Failure | - |  |  |  |  |
| Finland | 10073 | Screening Failure | ND |  |  |  |  |
| Finland | 10074 | Screening Failure | ND |  |  |  |  |
| Finland | 10075 | Screening Failure | + | X |  |  |  |
| Finland | 10076 | Screening Failure | - |  |  |  |  |
| Finland | 10077 | Screening Failure | - |  |  |  |  |
| Finland | 10078 | Completed | + | X |  |  |  |
| Finland | 10079 | Completed | + | X |  |  |  |
| Finland | 10080 | Screening Failure | - |  |  |  |  |
| Finland | 10081 | Screening Failure | - |  |  |  |  |
| Finland | 10082 | Screening Failure | - |  |  |  |  |
| Finland | 10083 | Screening Failure | - |  |  |  |  |
| Finland | 10084 | Completed | + |  | X |  | X |
| Finland | 10085 | Completed | + | X |  |  |  |
| Finland | 10086 | Completed | + | X |  |  |  |
| Finland | 10087 | Screening Failure | - |  |  |  |  |
| Finland | 10088 | Completed | + |  | X |  |  |
| Finland | 10089 | Screening Failure | - |  |  |  |  |
| Finland | 10090 | Completed | + | X | X |  |  |
| Finland | 10091 | Screening Failure | ND |  |  |  |  |
| Finland | 10092 | Completed | + | X |  |  |  |
| Finland | 10093 | Screening Failure | - |  |  |  |  |
| Finland | 10094 | Screening Failure | - |  |  |  |  |
| Finland | 10095 | Screening Failure | ND |  |  |  |  |
| Finland | 10096 | Completed | + | X |  |  |  |
| Finland | 10097 | Early termination | + |  | X |  | X |
| Finland | 10098 | Completed | + | X |  |  |  |
| Finland | 10099 | Completed | + | X |  |  |  |
| Finland | 10100 | Screening Failure | - |  |  |  |  |
| Finland | 10101 | Screening Failure | + |  |  |  | X |
| Finland | 10102 | Screening Failure | - |  |  |  |  |
| Finland | 10103 | Screening Failure | - |  |  |  |  |
| Finland | 10104 | Screening Failure | ND |  |  |  |  |
| Finland | 10105 | Completed | + |  |  |  | X |
| Finland | 10106 | Screening Failure | - |  |  |  |  |
| Finland | 10107 | Completed | + |  | X |  | X |
| Finland | 20001 | Completed | + | X |  |  |  |
| Finland | 20002 | Screening Failure | - |  |  |  |  |
| Finland | 20003 | Screening Failure | - |  |  |  |  |
| Finland | 20004 | Screening Failure | ND |  |  |  |  |
| Finland | 20005 | Screening Failure | - |  |  |  |  |
| Finland | 20006 | Screening Failure | - |  |  |  |  |
| Finland | 20007 | Screening Failure | ND |  |  |  |  |
| Finland | 20008 | Screening Failure | - |  |  |  |  |
| Finland | 20009 | Screening Failure | - |  |  |  |  |
| Finland | 20010 | Screening Failure | - |  |  |  |  |
| Finland | 20011 | Screening Failure | - |  |  |  |  |
| Finland | 20012 | Completed | + | X |  |  |  |
| Finland | 20013 | Screening Failure | - |  |  |  |  |
| Finland | 20014 | Screening Failure | - |  |  |  |  |
| Finland | 20015 | Screening Failure | - |  |  |  |  |
| Finland | 20016 | Screening Failure | - |  |  |  |  |
| Finland | 20017 | Screening Failure | - |  |  |  |  |
| Finland | 20018 | Completed | + |  | X |  | X |
| Finland | 20019 | Screening Failure | ND |  |  |  |  |
| Finland | 20020 | Screening Failure | - |  |  |  |  |
| Finland | 20021 | Screening Failure | - |  |  |  |  |
| Finland | 20022 | Screening Failure | - |  |  |  |  |
| Finland | 20023 | Screening Failure | - |  |  |  |  |
| Finland | 20024 | Screening Failure | - |  |  |  |  |
| Finland | 20025 | Early termination | + |  |  |  | X |
| Finland | 20026 | Screening Failure | ND |  |  |  |  |
| Finland | 20027 | Screening Failure | - |  |  |  |  |
| Finland | 20028 | Screening Failure | - |  |  |  |  |
| Finland | 20029 | Completed | + |  | X |  | X |
| Finland | 20030 | Screening Failure | ND |  |  |  |  |
| Finland | 20031 | Screening Failure | ND |  |  |  |  |
| Finland | 20032 | Screening Failure | - |  |  |  |  |
| Finland | 20033 | Screening Failure | - |  |  |  |  |
| Finland | 20034 | Screening Failure | - |  |  |  |  |
| Finland | 20035 | Completed | + |  | X |  | X |
| Finland | 20036 | Screening Failure | - |  |  |  |  |
| Finland | 20037 | Screening Failure | - |  |  |  |  |
| Finland | 20038 | Screening Failure | - |  |  |  |  |
| Finland | 20039 | Completed | + |  | X |  | X |
| Finland | 20040 | Screening Failure | - |  |  |  |  |
| Finland | 20041 | Completed | + |  | X |  | X |
| Finland | 20042 | Screening Failure | - |  |  |  |  |
| Finland | 20043 | Screening Failure | - |  |  |  |  |
| Finland | 20044 | Screening Failure | - |  |  |  |  |
| Finland | 20045 | Screening Failure | - |  |  |  |  |
| Finland | 20046 | Screening Failure | - |  |  |  |  |
| Finland | 20047 | Screening Failure | ND |  |  |  |  |
| Finland | 20048 | Screening Failure | - |  |  |  |  |
| Finland | 20049 | Screening Failure | - |  |  |  |  |
| Finland | 20050 | Screening Failure | - |  |  |  |  |
| Finland | 20051 | Screening Failure | - |  |  |  |  |
| Finland | 20052 | Screening Failure | - |  |  |  |  |
| Finland | 20053 | Screening Failure | + | X |  |  |  |
| Finland | 20054 | Screening Failure | - |  |  |  |  |
| Finland | 20055 | Screening Failure | - |  |  |  |  |
| Finland | 30001 | Completed | + |  |  | X |  |
| Finland | 30002 | Completed | + | X |  |  |  |
| Finland | 30003 | Screening Failure | - |  |  |  |  |
| Finland | 30004 | Screening Failure | - |  |  |  |  |
| Finland | 30005 | Screening Failure | - |  |  |  |  |
| Finland | 30006 | Screening Failure | ND |  |  |  |  |
| Finland | 30007 | Screening Failure | + | X |  |  |  |
| Finland | 30008 | Completed | + |  | X |  | X |
| Finland | 30009 | Screening Failure | - |  |  |  |  |
| Finland | 30010 | Completed | + |  | X |  | X |
| Finland | 30011 | Screening Failure | + |  |  | X |  |
| Finland | 30012 | Screening Failure | - |  |  |  |  |
| Finland | 30013 | Screening Failure | - |  |  |  |  |
| Finland | 30014 | Screening Failure | - |  |  |  |  |
| Finland | 30015 | Screening Failure | - |  |  |  |  |
| Finland | 30016 | Completed | + | X |  | X |  |
| Finland | 30017 | Screening Failure | ND |  |  |  |  |
| Finland | 30018 | Screening Failure | + |  |  | X |  |
| Finland | 30019 | Screening Failure | ND |  |  |  |  |
| Finland | 30020 | Screening Failure | ND |  |  |  |  |
| Finland | 30021 | Screening Failure | ND |  |  |  |  |
| Finland | 30022 | Screening Failure | - |  |  |  |  |
| Finland | 30023 | Screening Failure | - |  |  |  |  |
| Finland | 30024 | Completed | + | X |  |  |  |
| Finland | 30025 | Completed | + |  |  |  | X |
| Finland | 30026 | Screening Failure | - |  |  |  |  |
| Finland | 30027 | Screening Failure | - |  |  |  |  |
| Finland | 30028 | Completed | + |  | X |  | X |
| Finland | 30029 | Early termination | + | X |  | X |  |
| Finland | 30030 | Completed | + |  | X |  |  |
| Finland | 30031 | Screening Failure | + | X |  |  |  |
| Finland | 30032 | Screening Failure | - |  |  |  |  |
| Finland | 30033 | Screening Failure | - |  |  |  |  |
| Finland | 30034 | Screening Failure | - |  |  |  |  |
| Finland | 30035 | Screening Failure | - |  |  |  |  |
| Finland | 30036 | Screening Failure | ND |  |  |  |  |
| Finland | 30037 | Screening Failure | - |  |  |  |  |
| Finland | 30038 | Early termination | + | X |  |  |  |
| Finland | 30039 | Screening Failure | - |  |  |  |  |
| Finland | 30040 | Completed | + | X |  |  |  |
| Finland | 30041 | Screening Failure | - |  |  |  |  |
| Finland | 30042 | Screening Failure | ND |  |  |  |  |
| Finland | 30043 | Screening Failure | - |  |  |  |  |
| Finland | 30044 | Screening Failure | - |  |  |  |  |
| Finland | 30045 | Completed | + |  | X |  | X |
| Finland | 30046 | Screening Failure | + |  |  | X |  |
| Finland | 30047 | Screening Failure | - |  |  |  |  |
| Finland | 30048 | Screening Failure | - |  |  |  |  |
| Finland | 30049 | Screening Failure | - |  |  |  |  |
| Finland | 30050 | Screening Failure | - |  |  |  |  |
| Finland | 30051 | Screening Failure | ND |  |  |  |  |
| Finland | 30052 | Screening Failure | - |  |  |  |  |
| Finland | 30053 | Completed | + |  | X |  | X |
| Finland | 30054 | Early termination | + |  |  | X |  |
| Finland | 30055 | Screening Failure | - |  |  |  |  |
| Finland | 30056 | Early termination | + | X |  |  |  |
| Finland | 30057 | Screening Failure | - |  |  |  |  |
| Finland | 30058 | Screening Failure | - |  |  |  |  |
| Finland | 30059 | Completed | + |  | X |  |  |
| Finland | 30060 | Screening Failure | - |  |  |  |  |
| Finland | 30061 | Screening Failure | ND |  |  |  |  |
| Finland | 30062 | Completed | + | X |  |  | X |
| Finland | 30063 | Screening Failure | ND |  |  |  |  |
| Finland | 30064 | Completed | + | X |  |  |  |
| Finland | 30065 | Screening Failure | ND |  |  |  |  |
| Finland | 30066 | Screening Failure | ND |  |  |  |  |
| Finland | 30067 | Screening Failure | - |  |  |  |  |
| Finland | 30068 | Screening Failure | - |  |  |  |  |
| Finland | 30069 | Screening Failure | + | X |  |  |  |
| Finland | 30070 | Completed | + |  | X |  | X |
| Finland | 30071 | Screening Failure | ND |  |  |  |  |
| Finland | 30072 | Early termination | + |  |  | X |  |
| Finland | 30073 | Screening Failure | ND |  |  |  |  |
| Finland | 30074 | Screening Failure | ND |  |  |  |  |
| Finland | 30075 | Screening Failure | - |  |  |  |  |
| Finland | 30076 | Screening Failure | ND |  |  |  |  |
| Finland | 30077 | Screening Failure | - |  |  |  |  |
| Finland | 30078 | Screening Failure | - |  |  |  |  |
| Finland | 30079 | Screening Failure | - |  |  |  |  |
| Finland | 30080 | Screening Failure | ND |  |  |  |  |
| Finland | 30081 | Screening Failure | + | X |  |  |  |
| Finland | 30082 | Screening Failure | - |  |  |  |  |
| Finland | 30083 | Screening Failure | - |  |  |  |  |
| Finland | 30084 | Completed | + | X |  |  |  |
| Finland | 30085 | Screening Failure | ND |  |  |  |  |
| Finland | 30086 | Screening Failure | - |  |  |  |  |
| Finland | 30087 | Screening Failure | ND |  |  |  |  |
| Finland | 30088 | Screening Failure | ND |  |  |  |  |
| Finland | 40001 | Completed | + |  |  | X |  |
| Finland | 40002 | Screening Failure | - |  |  |  |  |
| Finland | 40003 | Screening Failure | - |  |  |  |  |
| Finland | 40004 | Screening Failure | - |  |  |  |  |
| Finland | 40005 | Screening Failure | - |  |  |  |  |
| Finland | 40006 | Screening Failure | - |  |  |  |  |
| Finland | 40007 | Screening Failure | - |  |  |  |  |
| Finland | 40008 | Screening Failure | - |  |  |  |  |
| Finland | 40009 | Screening Failure | - |  |  |  |  |
| Finland | 40010 | Screening Failure | ND |  |  |  |  |
| Finland | 40011 | Completed | + |  | X |  | X |
| Finland | 40012 | Screening Failure | - |  |  |  |  |
| Finland | 40013 | Screening Failure | - |  |  |  |  |
| Finland | 40014 | Completed | + |  | X |  | X |
| Finland | 40015 | Screening Failure | ND |  |  |  |  |
| Finland | 40016 | Completed | + | X |  |  |  |
| Finland | 40017 | Screening Failure | + | X |  |  |  |
| Finland | 40018 | Completed | + | X |  |  |  |
| Finland | 40019 | Screening Failure | - |  |  |  |  |
| Finland | 40020 | Screening Failure | - |  |  |  |  |
| Finland | 40021 | Screening Failure | ND |  |  |  |  |
| Finland | 40022 | Screening Failure | - |  |  |  |  |
| Finland | 40023 | Screening Failure | - |  |  |  |  |
| Finland | 40024 | Screening Failure | - |  |  |  |  |
| Finland | 40025 | Screening Failure | - |  |  |  |  |
| Finland | 40026 | Screening Failure | + |  |  | X |  |
| Finland | 40027 | Screening Failure | - |  |  |  |  |
| Finland | 40028 | Screening Failure | - |  |  |  |  |
| Finland | 40029 | Screening Failure | - |  |  |  |  |
| Finland | 40030 | Screening Failure | - |  |  |  |  |
| Finland | 40031 | Screening Failure | - |  |  |  |  |
| Finland | 40032 | Screening Failure | - |  |  |  |  |
| Finland | 40033 | Completed | + | X |  |  |  |
| Finland | 40034 | Screening Failure | - |  |  |  |  |
| Finland | 40035 | Screening Failure | - |  |  |  |  |
| Finland | 40036 | Screening Failure | - |  |  |  |  |
| Finland | 40037 | Screening Failure | - |  |  |  |  |
| Finland | 40038 | Screening Failure | - |  |  |  |  |
| Finland | 40039 | Screening Failure | - |  |  |  |  |
| Finland | 40040 | Screening Failure | - |  |  |  |  |
| Finland | 40041 | Completed | + | X |  |  |  |
| Finland | 40042 | Screening Failure | ND |  |  |  |  |
| Finland | 40043 | Completed | + |  |  | X |  |
| Finland | 40044 | Screening Failure | - |  |  |  |  |
| Finland | 40045 | Completed | + | X |  |  |  |
| Finland | 40046 | Screening Failure | - |  |  |  |  |
| Finland | 40047 | Screening Failure | ND |  |  |  |  |
| Finland | 40048 | Screening Failure | - |  |  |  |  |
| Finland | 40049 | Screening Failure | - |  |  |  |  |
| Finland | 40050 | Screening Failure | - |  |  |  |  |
| Finland | 40051 | Screening Failure | - |  |  |  |  |
| Finland | 40052 | Screening Failure | - |  |  |  |  |
| Finland | 40053 | Screening Failure | - |  |  |  |  |
| Finland | 40054 | Screening Failure | - |  |  |  |  |
| Finland | 40055 | Screening Failure | - |  |  |  |  |
| Finland | 40056 | Screening Failure | - |  |  |  |  |
| Finland | 40057 | Completed | + | X |  |  |  |
| Finland | 40058 | Screening Failure | - |  |  |  |  |
| Finland | 40059 | Completed | + | X |  |  |  |
| Finland | 40060 | Screening Failure | - |  |  |  |  |
| Finland | 40061 | Screening Failure | - |  |  |  |  |
| Finland | 40062 | Screening Failure | - |  |  |  |  |
| Finland | 40063 | Screening Failure | + |  | X |  | X |
| Finland | 40064 | Screening Failure | - |  |  |  |  |
| Finland | 40065 | Screening Failure | - |  |  |  |  |
| Finland | 40066 | Screening Failure | + |  | X |  | X |
| Finland | 40067 | Screening Failure | - |  |  |  |  |
| Finland | 40068 | Screening Failure | - |  |  |  |  |
| Finland | 40069 | Screening Failure | - |  |  |  |  |
| Finland | 40070 | Screening Failure | - |  |  |  |  |
| Finland | 40071 | Early termination | + | X |  |  |  |
| Finland | 50001 | Screening Failure | - |  |  |  |  |
| Finland | 50002 | Screening Failure | - |  |  |  |  |
| Finland | 50003 | Screening Failure | - |  |  |  |  |
| Finland | 50004 | Early termination | + |  | X |  | X |
| Finland | 50005 | Screening Failure | - |  |  |  |  |
| Finland | 50006 | Completed | + |  | X |  |  |
| Finland | 50007 | Screening Failure | - |  |  |  |  |
| Finland | 50008 | Screening Failure | - |  |  |  |  |
| Finland | 50009 | Screening Failure | - |  |  |  |  |
| Finland | 50010 | Screening Failure | ND |  |  |  |  |
| Finland | 50011 | Screening Failure | - |  |  |  |  |
| Finland | 50012 | Screening Failure | - |  |  |  |  |
| Finland | 50013 | Screening Failure | - |  |  |  |  |
| Finland | 50014 | Screening Failure | - |  |  |  |  |
| Finland | 50015 | Screening Failure | - |  |  |  |  |
| Finland | 50016 | Screening Failure | - |  |  |  |  |
| Finland | 50017 | Screening Failure | ND |  |  |  |  |
| Finland | 50018 | Screening Failure | ND |  |  |  |  |
| Finland | 50019 | Screening Failure | + |  |  |  | X |
| Finland | 50020 | Screening Failure | - |  |  |  |  |
| Finland | 50021 | Screening Failure | - |  |  |  |  |
| Finland | 50022 | Screening Failure | - |  |  |  |  |
| Finland | 50023 | Screening Failure | - |  |  |  |  |
| Finland | 50024 | Early termination | + | X |  |  |  |
| Finland | 50025 | Screening Failure | - |  |  |  |  |
| Finland | 50026 | Screening Failure | - |  |  |  |  |
| Finland | 50027 | Screening Failure | - |  |  |  |  |
| Finland | 50028 | Completed | + |  |  | X |  |
| Finland | 50029 | Screening Failure | + | X |  |  |  |
| Finland | 50030 | Screening Failure | - |  |  |  |  |
| Finland | 50031 | Screening Failure | - |  |  |  |  |
| Finland | 50032 | Screening Failure | ND |  |  |  |  |
| Finland | 50033 | Screening Failure | - |  |  |  |  |
| Finland | 50034 | Screening Failure | - |  |  |  |  |
| Finland | 50035 | Screening Failure | + | X |  |  |  |
| Finland | 50036 | Screening Failure | - |  |  |  |  |
| Finland | 50037 | Screening Failure | ND |  |  |  |  |
| Finland | 50038 | Screening Failure | + | X |  |  |  |
| Finland | 50039 | Completed | + |  | X |  | X |
| Finland | 50040 | Early termination | + |  |  | X |  |
| Finland | 50041 | Screening Failure | - |  |  |  |  |
| Finland | 50042 | Screening Failure | - |  |  |  |  |
| Finland | 50043 | Completed | + | X |  |  |  |
| Finland | 50044 | Screening Failure | - |  |  |  |  |
| Finland | 50045 | Completed | + |  |  | X |  |
| Finland | 50046 | Screening Failure | - |  |  |  |  |
| Finland | 50047 | Completed | + | X |  |  |  |
| Finland | 50048 | Screening Failure | - |  |  |  |  |
| Finland | 50049 | Screening Failure | - |  |  |  |  |
| Finland | 50050 | Screening Failure | - |  |  |  |  |
| Finland | 50051 | Screening Failure | - |  |  |  |  |
| Finland | 50052 | Screening Failure | - |  |  |  |  |
| Finland | 50053 | Screening Failure | - |  |  |  |  |
| Finland | 50054 | Screening Failure | - |  |  |  |  |
| Finland | 50055 | Screening Failure | - |  |  |  |  |
| Finland | 50056 | Completed | + | X |  |  |  |
| Finland | 50057 | Screening Failure | - |  |  |  |  |
| Finland | 50058 | Screening Failure | - |  |  |  |  |
| Finland | 50059 | Screening Failure | - |  |  |  |  |
| Finland | 50060 | Screening Failure | - |  |  |  |  |
| Finland | 50061 | Early termination | + | X |  |  |  |
| Finland | 50062 | Screening Failure | - |  |  |  |  |
| Finland | 50063 | Screening Failure | - |  |  |  |  |
| Finland | 50064 | Screening Failure | - |  |  |  |  |
| Finland | 50065 | Screening Failure | - |  |  |  |  |
| Finland | 50066 | Screening Failure | - |  |  |  |  |
| Finland | 50067 | Screening Failure | - |  |  |  |  |
| Sweden | 60001 | Completed | + | X | X |  | X |
| Sweden | 60002 | Screening Failure | - |  |  |  |  |
| Sweden | 60003 | Screening Failure | - |  |  |  |  |
| Sweden | 60004 | Early termination | + |  | X |  | X |
| Sweden | 60005 | Screening Failure | - |  |  |  |  |
| Sweden | 60006 | Screening Failure | - |  |  |  |  |
| Sweden | 60007 | Screening Failure | - |  |  |  |  |
| Sweden | 60008 | Screening Failure | - |  |  |  |  |
| Sweden | 60009 | Screening Failure | + | X |  |  |  |
| Sweden | 60010 | Screening Failure | + | X |  |  |  |
| Sweden | 60011 | Screening Failure | - |  |  |  |  |
| Sweden | 60012 | Screening Failure | - |  |  |  |  |
| Sweden | 60013 | Completed | + | X |  |  |  |
| Sweden | 60014 | Screening Failure | ND |  |  |  |  |
| Sweden | 60015 | Screening Failure | - |  |  |  |  |
| Sweden | 60016 | Screening Failure | ND |  |  |  |  |
| Sweden | 60017 | Screening Failure | ND |  |  |  |  |
| Sweden | 60018 | Screening Failure | - |  |  |  |  |
| Sweden | 60019 | Screening Failure | ND |  |  |  |  |
| Sweden | 60020 | Screening Failure | - |  |  |  |  |
| Sweden | 60021 | Screening Failure | ND |  |  |  |  |
| Sweden | 60022 | Screening Failure | ND |  |  |  |  |
| Sweden | 60023 | Screening Failure | - |  |  |  |  |
| Sweden | 60024 | Screening Failure | - |  |  |  |  |
| Sweden | 60025 | Completed | + |  | X |  |  |
| Sweden | 60026 | Screening Failure | - |  |  |  |  |
| Sweden | 60027 | Screening Failure | - |  |  |  |  |
| Sweden | 60028 | Completed | + |  |  |  | X |
| Sweden | 60029 | Screening Failure | + |  | X |  | X |
| Sweden | 60030 | Screening Failure | ND |  |  |  |  |
| Sweden | 60031 | Screening Failure | - |  |  |  |  |
| Sweden | 60032 | Screening Failure | - |  |  |  |  |
| Sweden | 60033 | Screening Failure | + |  | X |  | X |
| Sweden | 60034 | Screening Failure | - |  |  |  |  |
| Sweden | 60035 | Screening Failure | ND |  |  |  |  |
| Sweden | 60036 | Completed | + |  | X |  |  |
| Sweden | 60037 | Screening Failure | - |  |  |  |  |
| Sweden | 60038 | Screening Failure | - |  |  |  |  |
| Sweden | 60039 | Screening Failure | - |  |  |  |  |
| Sweden | 60040 | Screening Failure | ND |  |  |  |  |
| Sweden | 60041 | Screening Failure | - |  |  |  |  |
| Sweden | 60042 | Screening Failure | ND |  |  |  |  |
| Sweden | 60043 | Screening Failure | + | X |  |  |  |
| Sweden | 60044 | Screening Failure | - |  |  |  |  |
| Sweden | 60045 | Screening Failure | - |  |  |  |  |
| Sweden | 60046 | Screening Failure | - |  |  |  |  |
| Sweden | 60047 | Screening Failure | - |  |  |  |  |
| Sweden | 60048 | Screening Failure | - |  |  |  |  |
| Sweden | 60049 | Screening Failure | - |  |  |  |  |
| Sweden | 60050 | Screening Failure | - |  |  |  |  |
| Sweden | 60051 | Early termination | + | X |  |  |  |
| Sweden | 60052 | Early termination | + | X |  |  |  |
| Sweden | 60053 | Screening Failure | - |  |  |  |  |
| Sweden | 60054 | Screening Failure | + |  | X |  | X |
| Sweden | 60055 | Screening Failure | - |  |  |  |  |
| Sweden | 60056 | Screening Failure | - |  |  |  |  |
| Sweden | 60057 | Screening Failure | - |  |  |  |  |
| Sweden | 60058 | Screening Failure | ND |  |  |  |  |
| Sweden | 60059 | Completed | + |  | X |  | X |
| Sweden | 60060 | Early termination | + |  | X |  |  |
| Sweden | 60061 | Screening Failure | - |  |  |  |  |
| Sweden | 60062 | Screening Failure | - |  |  |  |  |
| Sweden | 60063 | Screening Failure | - |  |  |  |  |
| Sweden | 60064 | Screening Failure | ND |  |  |  |  |
| Sweden | 60065 | Screening Failure | - |  |  |  |  |
| Sweden | 60066 | Screening Failure | ND |  |  |  |  |
| Sweden | 60067 | Screening Failure | - |  |  |  |  |
| Sweden | 60068 | Early termination | + | X |  |  |  |
| Sweden | 60069 | Completed | + |  |  | X |  |
| Sweden | 60070 | Screening Failure | - |  |  |  |  |
| Sweden | 60071 | Screening Failure | - |  |  |  |  |
| Sweden | 60072 | Screening Failure | ND |  |  |  |  |
| Sweden | 60073 | Screening Failure | - |  |  |  |  |
| Sweden | 60074 | Screening Failure | - |  |  |  |  |
| Sweden | 60075 | Screening Failure | ND |  |  |  |  |
| Sweden | 60076 | Screening Failure | - |  |  |  |  |
| Sweden | 60077 | Completed | + |  | X |  | X |
| Sweden | 60078 | Completed | + |  | X |  |  |
| Sweden | 60079 | Screening Failure | - |  |  |  |  |
| Sweden | 60080 | Screening Failure | - |  |  |  |  |
| Sweden | 60081 | Screening Failure | - |  |  |  |  |
| Sweden | 60082 | Screening Failure | - |  |  |  |  |
| Sweden | 60083 | Screening Failure | - |  |  |  |  |
| Sweden | 60084 | Completed | + | X | X |  |  |
| Sweden | 60085 | Completed | + | X |  |  |  |
| Sweden | 60086 | Screening Failure | - |  |  |  |  |
| Sweden | 60087 | Completed | + |  |  | X |  |
| Sweden | 60088 | Early termination | + | X |  |  |  |
| Sweden | 60089 | Screening Failure | - |  |  |  |  |
| Sweden | 60090 | Screening Failure | ND |  |  |  |  |
| Estonia | 80001 | Screening Failure | ND |  |  |  |  |
| Latvia | 100001 | Early termination | - |  |  |  |  |
| Latvia | 100002 | Screening Failure | - |  |  |  |  |
| Latvia | 100003 | Screening Failure | + |  |  | X |  |
| Latvia | 100004 | Screening Failure | + |  | X |  | X |
| Latvia | 100005 | Screening Failure | - |  |  |  |  |
| Latvia | 100006 | Screening Failure | - |  |  |  |  |
| Latvia | 100007 | Screening Failure | - |  |  |  |  |
| Latvia | 100008 | Screening Failure | - |  |  |  |  |
| Latvia | 100009 | Early termination | + |  | X |  |  |
| Latvia | 100010 | Completed | + |  | X |  | X |
| Latvia | 100011 | Screening Failure | ND |  |  |  |  |
| Latvia | 100012 | Screening Failure | - |  |  |  |  |
| Poland | 140001 | Screening Failure | - |  |  |  |  |
| Poland | 140002 | Early termination | + |  | X |  |  |
| Poland | 140003 | Completed | + |  | X |  |  |
| Poland | 140004 | Screening Failure | - |  |  |  |  |
| Poland | 140005 | Screening Failure | - |  |  |  |  |
| Poland | 140006 | Screening Failure | - |  |  |  |  |
| Poland | 140007 | Screening Failure | - |  |  |  |  |
| Poland | 140008 | Screening Failure | - |  |  |  |  |
| Poland | 140009 | Screening Failure | - |  |  |  |  |
| Poland | 140010 | Early termination | + | X | X |  | X |
| Poland | 140011 | Completed | + |  |  |  | X |
| Poland | 140012 | Completed | + |  | X |  |  |
| Poland | 140013 | Screening Failure | - |  |  |  |  |
| Poland | 140014 | Screening Failure | - |  |  |  |  |
| Poland | 140015 | Screening Failure | - |  |  |  |  |
| Poland | 140016 | Screening Failure | - |  |  |  |  |
| Poland | 140017 | Screening Failure | - |  |  |  |  |
| Poland | 140018 | Completed | + | X |  |  |  |
| Poland | 140019 | Screening Failure | - |  |  |  |  |
| Poland | 140020 | Early termination | + | X |  |  |  |
| Poland | 140021 | Completed | + |  | X |  | X |
| Poland | 140022 | Screening Failure | - |  |  |  |  |
| Poland | 140023 | Screening Failure | - |  |  |  |  |
| Poland | 140024 | Screening Failure | + | X |  |  |  |
| Poland | 140025 | Screening Failure | + |  | X |  | X |
| Poland | 140026 | Screening Failure | - |  |  |  |  |
| Poland | 140027 | Early termination | + |  |  | X |  |
| Poland | 140028 | Screening Failure | - |  |  |  |  |
| Poland | 140029 | Early termination | + | X | X |  | X |
| Poland | 140030 | Screening Failure | - |  |  |  |  |
| Poland | 140031 | Screening Failure | - |  |  |  |  |
| Poland | 150001 | Completed | + |  | X |  | X |
| Poland | 150002 | Screening Failure | - |  |  |  |  |
| Poland | 150003 | Screening Failure | - |  |  |  |  |
| Poland | 150004 | Screening Failure | - |  |  |  |  |
| Poland | 150005 | Screening Failure | - |  |  |  |  |
| Poland | 150006 | Early termination | + | X |  |  |  |
| Poland | 150007 | Early termination | + |  | X |  | X |
| Poland | 150008 | Screening Failure | - |  |  |  |  |
| Poland | 150009 | Screening Failure | - |  |  |  |  |
| Poland | 150010 | Completed | + | X |  |  |  |
| Poland | 150011 | Screening Failure | - |  |  |  |  |
| Poland | 150012 | Screening Failure | - |  |  |  |  |
| Poland | 150013 | Completed | + | X |  |  |  |
| Poland | 150014 | Completed | + |  | X |  | X |
| Poland | 150015 | Screening Failure | - |  |  |  |  |
| Poland | 150016 | Completed | + |  | X |  |  |
| Poland | 150017 | Completed | + |  | X |  |  |
| Poland | 150018 | Screening Failure | - |  |  |  |  |
| Poland | 150019 | Screening Failure | - |  |  |  |  |
| Poland | 150020 | Screening Failure | - |  |  |  |  |
| Poland | 150021 | Screening Failure | - |  |  |  |  |
| Poland | 150022 | Completed | + | X |  |  |  |
| Poland | 150023 | Screening Failure | - |  |  |  |  |
| Poland | 150024 | Completed | + |  | X |  |  |
| Poland | 150025 | Screening Failure | - |  |  |  |  |
| Poland | 150026 | Screening Failure | - |  |  |  |  |
| Poland | 150027 | Screening Failure | - |  |  |  |  |
| Poland | 150028 | Screening Failure | - |  |  |  |  |
| Poland | 150029 | Screening Failure | - |  |  |  |  |
| Poland | 150030 | Screening Failure | - |  |  |  |  |
| Poland | 150031 | Completed | + |  | X |  |  |
| Poland | 150032 | Screening Failure | - |  |  |  |  |
| Poland | 150033 | Screening Failure | - |  |  |  |  |
| Poland | 150034 | Early termination | + | X |  |  |  |
| Poland | 150035 | Screening Failure | - |  |  |  |  |
| Poland | 150036 | Screening Failure | - |  |  |  |  |
| Poland | 150037 | Screening Failure | - |  |  |  |  |
| Poland | 150038 | Screening Failure | - |  |  |  |  |
| Poland | 150039 | Screening Failure | - |  |  |  |  |
| Poland | 150040 | Completed | + | X |  |  |  |
| Poland | 150041 | Early termination | + |  |  | X |  |
| Poland | 150042 | Completed | + | X | X |  | X |
| Poland | 150043 | Early termination | + | X |  |  |  |
| Bulgaria | 160001 | Screening Failure | - |  |  |  |  |
| Bulgaria | 160002 | Completed | + |  | X |  | X |
| Bulgaria | 160003 | Screening Failure | - |  |  |  |  |
| Bulgaria | 160004 | Screening Failure | + |  | X |  | X |
| Bulgaria | 160005 | Screening Failure | - |  |  |  |  |
| Bulgaria | 160006 | Screening Failure | + | X |  | X |  |
| Bulgaria | 160007 | Completed | + | X |  |  |  |
| Bulgaria | 160008 | Screening Failure | - |  |  |  |  |
| Bulgaria | 160009 | Screening Failure | - |  |  |  |  |
| Bulgaria | 160010 | Completed | + |  | X |  | X |
| Bulgaria | 160011 | Screening Failure | + | X |  |  |  |
| Bulgaria | 160012 | Screening Failure | - |  |  |  |  |
| Bulgaria | 160013 | Screening Failure | - |  |  |  |  |
| Bulgaria | 160014 | Screening Failure | - |  |  |  |  |
| Bulgaria | 160015 | Screening Failure | - |  |  |  |  |
| Bulgaria | 160016 | Screening Failure | - |  |  |  |  |
| Bulgaria | 160017 | Screening Failure | - |  |  |  |  |
| Bulgaria | 160018 | Screening Failure | - |  |  |  |  |
| Bulgaria | 160019 | Screening Failure | - |  |  |  |  |
| Bulgaria | 160020 | Early termination | + | X |  |  |  |
| Bulgaria | 160021 | Early termination | + |  | X |  |  |
| Bulgaria | 160022 | Screening Failure | - |  |  |  |  |
| Bulgaria | 160023 | Early termination | + |  |  | X |  |
| Bulgaria | 160024 | Screening Failure | - |  |  |  |  |
| Bulgaria | 160025 | Screening Failure | - |  |  |  |  |
| Bulgaria | 160026 | Completed | + | X |  |  |  |
| Bulgaria | 160027 | Screening Failure | - |  |  |  |  |
| Bulgaria | 160028 | Screening Failure | - |  |  |  |  |
| Bulgaria | 160029 | Early termination | + |  |  |  | X |
| Bulgaria | 160030 | Screening Failure | - |  |  |  |  |
| Bulgaria | 160031 | Screening Failure | - |  |  |  |  |
| Bulgaria | 160032 | Screening Failure | - |  |  |  |  |
| Bulgaria | 160033 | Screening Failure | + |  |  | X |  |
| Bulgaria | 160034 | Screening Failure | - |  |  |  |  |
| Bulgaria | 160035 | Screening Failure | - |  |  |  |  |
| Bulgaria | 160036 | Screening Failure | ND |  |  |  |  |
| Bulgaria | 160037 | Screening Failure | - |  |  |  |  |
| Bulgaria | 160038 | Completed | + | X |  |  |  |
| Bulgaria | 160039 | Screening Failure | - |  |  |  |  |
| Bulgaria | 160040 | Screening Failure | - |  |  |  |  |
| Bulgaria | 160041 | Screening Failure | - |  |  |  |  |
| Bulgaria | 160042 | Screening Failure | - |  |  |  |  |
| Bulgaria | 160043 | Screening Failure | - |  |  |  |  |
| Bulgaria | 160044 | Completed | + | X |  |  |  |
| Bulgaria | 160045 | Screening Failure | + | X |  |  |  |
| Bulgaria | 160046 | Completed | + |  |  | X |  |
| Bulgaria | 160047 | Screening Failure | - |  |  |  |  |
| Bulgaria | 160048 | Screening Failure | - |  |  |  |  |
| Bulgaria | 160049 | Screening Failure | - |  |  |  |  |
| Bulgaria | 160050 | Screening Failure | - |  |  |  |  |
| Bulgaria | 160051 | Screening Failure | - |  |  |  |  |
| Bulgaria | 160052 | Early termination | + |  | X |  | X |
| Bulgaria | 160053 | Screening Failure | - |  |  |  |  |
| Bulgaria | 160054 | Screening Failure | + |  |  | X |  |
| Bulgaria | 160055 | Early termination | + |  | X |  | X |
| Bulgaria | 160056 | Completed | + | X | X |  |  |
| Bulgaria | 160057 | Screening Failure | - |  |  |  |  |
| Bulgaria | 160058 | Screening Failure | - |  |  |  |  |
| Bulgaria | 160059 | Early termination | + |  |  | X |  |
| Bulgaria | 160060 | Early termination | + |  |  |  | X |
| Bulgaria | 160061 | Screening Failure | - |  |  |  |  |
| Bulgaria | 160062 | Screening Failure | ND |  |  |  |  |
| Bulgaria | 160063 | Screening Failure | - |  |  |  |  |
| Bulgaria | 160064 | Screening Failure | + | X |  |  |  |
| Bulgaria | 160065 | Screening Failure | - |  |  |  |  |
| Bulgaria | 160066 | Screening Failure | - |  |  |  |  |
| Bulgaria | 160067 | Screening Failure | - |  |  |  |  |
| Bulgaria | 160068 | Screening Failure | - |  |  |  |  |
| Bulgaria | 160069 | Screening Failure | - |  |  |  |  |
| Bulgaria | 160070 | Early termination | + | X |  |  |  |
| Bulgaria | 160071 | Completed | + | X |  |  |  |
| Bulgaria | 160072 | Early termination | + |  | X |  | X |
| Bulgaria | 160073 | Early termination | + | X | X |  | X |
| Bulgaria | 160074 | Screening Failure | - |  |  |  |  |
| Bulgaria | 160075 | Early termination | + |  | X |  |  |
| Bulgaria | 160076 | Screening Failure | - |  |  |  |  |
| Bulgaria | 160077 | Screening Failure | - |  |  |  |  |
| Bulgaria | 160078 | Screening Failure | - |  |  |  |  |
| Bulgaria | 160079 | Completed | + | X |  |  |  |
| Bulgaria | 160080 | Screening Failure | - |  |  |  |  |
| Bulgaria | 160081 | Screening Failure | - |  |  |  |  |
| Bulgaria | 160082 | Screening Failure | - |  |  |  |  |
| Bulgaria | 160083 | Completed | + | X |  |  |  |
| Bulgaria | 160084 | Screening Failure | - |  |  |  |  |
| Bulgaria | 160085 | Screening Failure | - |  |  |  |  |
| Bulgaria | 160086 | Completed | + | X |  | X |  |
| Bulgaria | 160087 | Screening Failure | - |  |  |  |  |
| Bulgaria | 160088 | Screening Failure | - |  |  |  |  |
| Bulgaria | 160089 | Screening Failure | ND |  |  |  |  |
| Bulgaria | 160090 | Screening Failure | - |  |  |  |  |
| Bulgaria | 160091 | Screening Failure | + | X | X |  | X |
| Bulgaria | 160092 | Screening Failure | - |  |  |  |  |
| Bulgaria | 160093 | Screening Failure | + | X |  |  |  |
| Bulgaria | 160094 | Screening Failure | - |  |  |  |  |
| Bulgaria | 160095 | Screening Failure | - |  |  |  |  |
| Bulgaria | 160096 | Screening Failure | - |  |  |  |  |
| Bulgaria | 160097 | Screening Failure | ND |  |  |  |  |
| Bulgaria | 160098 | Screening Failure | - |  |  |  |  |
| Bulgaria | 160099 | Completed | + |  |  | X |  |
| Bulgaria | 160100 | Screening Failure | - |  |  |  |  |
| Bulgaria | 160101 | Early termination | + |  | X |  |  |
| Bulgaria | 160102 | Completed | + |  | X |  | X |
| Bulgaria | 160103 | Screening Failure | - |  |  |  |  |
| Bulgaria | 160104 | Completed | + |  | X |  | X |
| Bulgaria | 160105 | Completed | + | X |  |  |  |
| Bulgaria | 160106 | Screening Failure | - |  |  |  |  |
| Bulgaria | 160107 | Screening Failure | - |  |  |  |  |
| Bulgaria | 160108 | Screening Failure | - |  |  |  |  |
| Bulgaria | 160109 | Screening Failure | - |  |  |  |  |
| Bulgaria | 160110 | Completed | + | X |  |  |  |
| Bulgaria | 160111 | Screening Failure | - |  |  |  |  |
| Bulgaria | 160112 | Completed | + |  |  | X |  |
| Bulgaria | 160113 | Screening Failure | - |  |  |  |  |
| Bulgaria | 170001 | Screening Failure | - |  |  |  |  |
| Bulgaria | 170002 | Early termination | + |  |  | X |  |
| Bulgaria | 170003 | Screening Failure | - |  |  |  |  |
| Bulgaria | 170004 | Early termination | + | X |  |  |  |
| Bulgaria | 170005 | Screening Failure | - |  |  |  |  |
| Bulgaria | 170006 | Screening Failure | - |  |  |  |  |
| Bulgaria | 170007 | Screening Failure | - |  |  |  |  |
| Bulgaria | 170008 | Screening Failure | - |  |  |  |  |
| Bulgaria | 170009 | Completed | + | X |  |  |  |
| Bulgaria | 170010 | Completed | + |  |  | X |  |
| Bulgaria | 170011 | Screening Failure | - |  |  |  |  |
| Bulgaria | 170012 | Screening Failure | - |  |  |  |  |
| Bulgaria | 170013 | Screening Failure | ND |  |  |  |  |
| Bulgaria | 170014 | Completed | + | X |  |  |  |
| Bulgaria | 170015 | Screening Failure | + |  |  | X |  |
| Bulgaria | 170016 | Screening Failure | - |  |  |  |  |
| Bulgaria | 170017 | Screening Failure | - |  |  |  |  |
| Bulgaria | 170018 | Screening Failure | - |  |  |  |  |
| Bulgaria | 170019 | Completed | + |  |  | X |  |
| Bulgaria | 170020 | Screening Failure | - |  |  |  |  |
| Bulgaria | 170021 | Screening Failure | - |  |  |  |  |
| Bulgaria | 170022 | Screening Failure | - |  |  |  |  |
| Bulgaria | 170023 | Screening Failure | - |  |  |  |  |
| Bulgaria | 170024 | Screening Failure | - |  |  |  |  |
| Bulgaria | 170025 | Screening Failure | - |  |  |  |  |
| Bulgaria | 170026 | Screening Failure | - |  |  |  |  |
| Bulgaria | 170027 | Completed | + | X |  |  |  |
| Bulgaria | 170028 | Screening Failure | - |  |  |  |  |
| Bulgaria | 170029 | Screening Failure | - |  |  |  |  |
| Bulgaria | 170030 | Screening Failure | - |  |  |  |  |
| Bulgaria | 170031 | Screening Failure | - |  |  |  |  |
| Bulgaria | 170032 | Screening Failure | - |  |  |  |  |
| Bulgaria | 170033 | Early termination | + |  | X |  |  |
| Bulgaria | 170034 | Completed | + |  |  | X |  |
| Bulgaria | 170035 | Screening Failure | - |  |  |  |  |
| Bulgaria | 170036 | Completed | + | X |  |  |  |
| Bulgaria | 170037 | Early termination | + | X |  | X |  |
| Bulgaria | 170038 | Screening Failure | - |  |  |  |  |
| Bulgaria | 170039 | Screening Failure | - |  |  |  |  |
| Bulgaria | 170040 | Screening Failure | - |  |  |  |  |
| Bulgaria | 170041 | Early termination | + | X |  |  |  |
| Bulgaria | 170042 | Screening Failure | - |  |  |  |  |
| Bulgaria | 170043 | Early termination | + | X | X |  | X |
| Bulgaria | 170044 | Screening Failure | - |  |  |  |  |
| Bulgaria | 170045 | Screening Failure | - |  |  |  |  |
| Bulgaria | 170046 | Screening Failure | - |  |  |  |  |
| Bulgaria | 170047 | Screening Failure | - |  |  |  |  |
| Bulgaria | 170048 | Screening Failure | - |  |  |  |  |
| Bulgaria | 170049 | Screening Failure | + | X |  |  |  |
| Bulgaria | 170050 | Screening Failure | + |  | X |  | X |
| Bulgaria | 170051 | Screening Failure | - |  |  |  |  |
| Bulgaria | 170052 | Screening Failure | - |  |  |  |  |
| Bulgaria | 170053 | Screening Failure | - |  |  |  |  |
| Bulgaria | 170054 | Screening Failure | - |  |  |  |  |
| Bulgaria | 170055 | Screening Failure | - |  |  |  |  |
| Bulgaria | 170056 | Screening Failure | - |  |  |  |  |
| Bulgaria | 170057 | Screening Failure | - |  |  |  |  |
| Bulgaria | 170058 | Screening Failure | + | X |  |  |  |
| Bulgaria | 170059 | Completed | + |  | X |  | X |
| Bulgaria | 170060 | Screening Failure | - |  |  |  |  |
| Bulgaria | 170061 | Screening Failure | - |  |  |  |  |
| Bulgaria | 170062 | Screening Failure | - |  |  |  |  |
| Bulgaria | 170063 | Screening Failure | - |  |  |  |  |
| Bulgaria | 170064 | Screening Failure | - |  |  |  |  |
| Bulgaria | 170065 | Screening Failure | - |  |  |  |  |
| Bulgaria | 170066 | Early termination | + |  |  |  | X |
| Bulgaria | 170067 | Screening Failure | - |  |  |  |  |
| Bulgaria | 170068 | Screening Failure | + |  | X |  | X |
| Bulgaria | 170069 | Screening Failure | - |  |  |  |  |
| Bulgaria | 170070 | Screening Failure | - |  |  |  |  |
| Bulgaria | 170071 | Screening Failure | - |  |  |  |  |
| Bulgaria | 170072 | Screening Failure | + |  | X |  | X |
| Bulgaria | 170073 | Screening Failure | - |  |  |  |  |
| Bulgaria | 170074 | Completed | + | X |  |  |  |
| Bulgaria | 170075 | Screening Failure | - |  |  |  |  |
| Bulgaria | 170076 | Completed | + |  | X |  |  |
| Bulgaria | 170077 | Screening Failure | - |  |  |  |  |
| Bulgaria | 170078 | Screening Failure | - |  |  |  |  |
| Bulgaria | 170079 | Screening Failure | - |  |  |  |  |
| Bulgaria | 170080 | Screening Failure | - |  |  |  |  |
| Bulgaria | 170081 | Early termination | + | X |  |  |  |
| Bulgaria | 170082 | Completed | + | X |  |  |  |
| Bulgaria | 170083 | Completed | + |  | X |  | X |
| Bulgaria | 170084 | Completed | + | X |  |  |  |
| Bulgaria | 170085 | Screening Failure | - |  |  |  |  |
| Bulgaria | 170086 | Screening Failure | - |  |  |  |  |
| Bulgaria | 170087 | Screening Failure | - |  |  |  |  |
| Bulgaria | 170088 | Screening Failure | - |  |  |  |  |
| Bulgaria | 170089 | Screening Failure | - |  |  |  |  |
| Bulgaria | 170090 | Screening Failure | - |  |  |  |  |
| Bulgaria | 170091 | Screening Failure | + |  | X |  |  |
| Bulgaria | 170092 | Screening Failure | - |  |  |  |  |
| Bulgaria | 170093 | Screening Failure | + | X |  |  |  |
| Bulgaria | 170094 | Screening Failure | + | X |  |  |  |
| Bulgaria | 170095 | Screening Failure | + | X |  |  |  |
| Bulgaria | 170096 | Screening Failure | - |  |  |  |  |
| Bulgaria | 170097 | Screening Failure | - |  |  |  |  |
| Bulgaria | 170098 | Completed | + |  | X |  |  |
| Bulgaria | 170099 | Screening Failure | + |  | X |  |  |
| Bulgaria | 170100 | Screening Failure | - |  |  |  |  |
| Bulgaria | 170101 | Screening Failure | - |  |  |  |  |
| Bulgaria | 170102 | Screening Failure | - |  |  |  |  |
| Bulgaria | 170103 | Screening Failure | - |  |  |  |  |
| Bulgaria | 170104 | Screening Failure | - |  |  |  |  |
| Bulgaria | 170105 | Screening Failure | - |  |  |  |  |
| Bulgaria | 170106 | Screening Failure | - |  |  |  |  |
| Bulgaria | 170107 | Screening Failure | - |  |  |  |  |
| Bulgaria | 170108 | Screening Failure | - |  |  |  |  |
| Bulgaria | 180001 | Screening Failure | - |  |  |  |  |
| Bulgaria | 180002 | Screening Failure | - |  |  |  |  |
| Bulgaria | 180003 | Screening Failure | - |  |  |  |  |
| Bulgaria | 180004 | Screening Failure | - |  |  |  |  |
| Bulgaria | 180005 | Screening Failure | - |  |  |  |  |
| Bulgaria | 180006 | Completed | + |  | X |  | X |
| Bulgaria | 180007 | Screening Failure | - |  |  |  |  |
| Bulgaria | 180008 | Screening Failure | - |  |  |  |  |
| Bulgaria | 180009 | Screening Failure | - |  |  |  |  |
| Bulgaria | 180010 | Screening Failure | - |  |  |  |  |
| Bulgaria | 180011 | Completed | + | X |  | X |  |
| Bulgaria | 180012 | Screening Failure | - |  |  |  |  |
| Bulgaria | 180013 | Screening Failure | - |  |  |  |  |
| Bulgaria | 180014 | Screening Failure | - |  |  |  |  |
| Bulgaria | 180015 | Screening Failure | - |  |  |  |  |
| Bulgaria | 180016 | Screening Failure | - |  |  |  |  |
| Bulgaria | 180017 | Completed | + |  |  | X |  |
| Bulgaria | 180018 | Screening Failure | - |  |  |  |  |
| Bulgaria | 180019 | Screening Failure | - |  |  |  |  |
| Bulgaria | 180020 | Screening Failure | - |  |  |  |  |
| Bulgaria | 180021 | Completed | + |  |  | X |  |
| Bulgaria | 180022 | Screening Failure | - |  |  |  |  |
| Bulgaria | 180023 | Completed | + |  | X |  | X |
| Bulgaria | 180024 | Screening Failure | - |  |  |  |  |
| Bulgaria | 180025 | Screening Failure | - |  |  |  |  |
| Bulgaria | 180026 | Completed | + | X | X |  |  |
| Bulgaria | 180027 | Completed | + |  |  |  | X |
| Bulgaria | 180028 | Screening Failure | - |  |  |  |  |
| Bulgaria | 180029 | Completed | + |  | X |  |  |
| Bulgaria | 180030 | Completed | + |  | X |  | X |
| Bulgaria | 180031 | Completed | + |  | X |  |  |
| Bulgaria | 180032 | Screening Failure | - |  |  |  |  |
| Bulgaria | 180033 | Completed | + |  |  | X |  |
| Bulgaria | 180034 | Completed | + |  | X |  | X |
| Bulgaria | 180035 | Screening Failure | - |  |  |  |  |
| Bulgaria | 180036 | Screening Failure | - |  |  |  |  |
| Bulgaria | 180037 | Early termination | + |  |  | X |  |
| Bulgaria | 180038 | Screening Failure | - |  |  |  |  |
| Bulgaria | 180039 | Screening Failure | - |  |  |  |  |
| Bulgaria | 180040 | Completed | + | X |  |  |  |
| Bulgaria | 180041 | Completed | + |  |  | X |  |
| Bulgaria | 180042 | Screening Failure | - |  |  |  |  |
| Bulgaria | 180043 | Completed | + |  | X |  | X |
| Bulgaria | 180044 | Screening Failure | - |  |  |  |  |
| Bulgaria | 180045 | Early termination | + |  |  | X |  |
| Bulgaria | 180046 | Screening Failure | - |  |  |  |  |
| Bulgaria | 180047 | Screening Failure | - |  |  |  |  |
| Bulgaria | 180048 | Completed | + |  | X |  | X |
| Bulgaria | 180049 | Screening Failure | - |  |  |  |  |
| Bulgaria | 180050 | Screening Failure | - |  |  |  |  |
| Bulgaria | 180051 | Screening Failure | - |  |  |  |  |
| Bulgaria | 180052 | Screening Failure | - |  |  |  |  |
| Bulgaria | 180053 | Screening Failure | - |  |  |  |  |
| Bulgaria | 180054 | Completed | + |  |  | X |  |
| Bulgaria | 180055 | Screening Failure | - |  |  |  |  |
| Bulgaria | 180056 | Completed | + |  |  | X |  |
| Bulgaria | 180057 | Screening Failure | - |  |  |  |  |
| Bulgaria | 180058 | Completed | + | X |  | X |  |
| Bulgaria | 180059 | Screening Failure | - |  |  |  |  |
| Bulgaria | 180060 | Screening Failure | - |  |  |  |  |
| Bulgaria | 180061 | Screening Failure | - |  |  |  |  |
| Bulgaria | 180062 | Screening Failure | - |  |  |  |  |
| Bulgaria | 180063 | Completed | + | X | X |  |  |
| Bulgaria | 180064 | Completed | + | X |  |  |  |
| Bulgaria | 180065 | Screening Failure | - |  |  |  |  |
| Bulgaria | 180066 | Completed | + |  | X |  | X |
| Bulgaria | 180067 | Screening Failure | - |  |  |  |  |
| Bulgaria | 180068 | Screening Failure | + |  |  | X |  |
| Bulgaria | 180069 | Screening Failure | - |  |  |  |  |
| Bulgaria | 180070 | Screening Failure | - |  |  |  |  |
| Bulgaria | 180071 | Screening Failure | - |  |  |  |  |
| Bulgaria | 180072 | Screening Failure | - |  |  |  |  |
| Bulgaria | 180073 | Screening Failure | - |  |  |  |  |
| Bulgaria | 180074 | Completed | + | X |  |  |  |
| Bulgaria | 180075 | Completed | + | X |  |  |  |
| Bulgaria | 180076 | Completed | + |  |  |  | X |
| Bulgaria | 180077 | Early termination | + | X |  |  |  |
| Bulgaria | 180078 | Screening Failure | - |  |  |  |  |
| Bulgaria | 180079 | Early termination | + |  |  | X |  |
| Bulgaria | 180080 | Screening Failure | - |  |  |  |  |
| Bulgaria | 180081 | Screening Failure | - |  |  |  |  |
| Bulgaria | 180082 | Completed | + |  | X |  | X |
| Bulgaria | 180083 | Screening Failure | - |  |  |  |  |
| Bulgaria | 180084 | Screening Failure | - |  |  |  |  |
| Bulgaria | 190001 | Screening Failure | - |  |  |  |  |
| Bulgaria | 190002 | Screening Failure | - |  |  |  |  |
| Bulgaria | 190003 | Completed | + |  |  | X |  |
| Bulgaria | 190004 | Screening Failure | - |  |  |  |  |
| Bulgaria | 190005 | Screening Failure | - |  |  |  |  |
| Bulgaria | 190006 | Screening Failure | - |  |  |  |  |
| Bulgaria | 190007 | Screening Failure | - |  |  |  |  |
| Bulgaria | 190008 | Screening Failure | - |  |  |  |  |
| Bulgaria | 190009 | Screening Failure | - |  |  |  |  |
| Bulgaria | 190010 | Completed | + | X |  |  |  |
| Bulgaria | 190011 | Screening Failure | - |  |  |  |  |
| Bulgaria | 190012 | Screening Failure | - |  |  |  |  |
| Bulgaria | 190013 | Screening Failure | - |  |  |  |  |
| Bulgaria | 190014 | Screening Failure | + |  | X |  |  |
| Bulgaria | 190015 | Screening Failure | - |  |  |  |  |
| Bulgaria | 190016 | Screening Failure | + | X |  |  |  |
| Bulgaria | 190017 | Screening Failure | + |  | X |  | X |
| Bulgaria | 190018 | Screening Failure | - |  |  |  |  |
| Bulgaria | 190019 | Screening Failure | - |  |  |  |  |
| Bulgaria | 190020 | Completed | + |  | X |  |  |
| Bulgaria | 190021 | Screening Failure | - |  |  |  |  |
| Bulgaria | 190022 | Screening Failure | - |  |  |  |  |
| Bulgaria | 190023 | Screening Failure | - |  |  |  |  |
| Bulgaria | 190024 | Screening Failure | - |  |  |  |  |
| Bulgaria | 190025 | Screening Failure | - |  |  |  |  |
| Bulgaria | 190026 | Screening Failure | - |  |  |  |  |
| Bulgaria | 190027 | Screening Failure | - |  |  |  |  |
| Bulgaria | 190028 | Screening Failure | - |  |  |  |  |
| Bulgaria | 190029 | Screening Failure | - |  |  |  |  |
| Bulgaria | 190030 | Screening Failure | - |  |  |  |  |
| Bulgaria | 190031 | Screening Failure | + |  | X | X |  |
| Bulgaria | 190032 | Screening Failure | - |  |  |  |  |
| Bulgaria | 190033 | Screening Failure | ND |  |  |  |  |
| Bulgaria | 190034 | Screening Failure | - |  |  |  |  |
| Bulgaria | 190035 | Completed | + |  | X |  |  |
| Bulgaria | 190036 | Screening Failure | + |  | X |  |  |
| Bulgaria | 190037 | Screening Failure | - |  |  |  |  |
| Bulgaria | 190038 | Screening Failure | - |  |  |  |  |
| Bulgaria | 200001 | Completed | + |  | X |  |  |
| Bulgaria | 200002 | Screening Failure | - |  |  |  |  |
| Bulgaria | 200003 | Completed | + |  |  | X | X |
| Bulgaria | 200004 | Completed | + | X |  |  |  |
| Bulgaria | 200005 | Screening Failure | - |  |  |  |  |
| Bulgaria | 200006 | Completed | + |  |  | X |  |
| Bulgaria | 200007 | Screening Failure | - |  |  |  |  |
| Bulgaria | 200008 | Completed | + |  | X |  | X |
| Bulgaria | 200009 | Completed | + |  | X |  | X |
| Bulgaria | 200010 | Screening Failure | - |  |  |  |  |
| Bulgaria | 200011 | Completed | + |  | X |  | X |
| Bulgaria | 200012 | Completed | + |  | X |  | X |
| Bulgaria | 200013 | Completed | + |  | X |  |  |
| Bulgaria | 200014 | Early termination | + | X |  |  |  |
| Bulgaria | 200015 | Screening Failure | - |  |  |  |  |
| Bulgaria | 200016 | Screening Failure | - |  |  |  |  |
| Bulgaria | 200017 | Screening Failure | - |  |  |  |  |
| Bulgaria | 200018 | Completed | + |  |  | X |  |
| Bulgaria | 200019 | Screening Failure | - |  |  |  |  |
| Bulgaria | 200020 | Screening Failure | - |  |  |  |  |
| Bulgaria | 200021 | Screening Failure | - |  |  |  |  |
| Bulgaria | 200022 | Screening Failure | - |  |  |  |  |
| Bulgaria | 200023 | Screening Failure | - |  |  |  |  |
| Bulgaria | 200024 | Screening Failure | - |  |  |  |  |
| Bulgaria | 200025 | Screening Failure | - |  |  |  |  |
| Bulgaria | 200026 | Completed | + |  | X |  | X |
| Bulgaria | 200027 | Screening Failure | - |  |  |  |  |
| Bulgaria | 200028 | Completed | + |  | X |  |  |
| Bulgaria | 200029 | Screening Failure | - |  |  |  |  |
| Bulgaria | 200030 | Screening Failure | - |  |  |  |  |
| Bulgaria | 200031 | Completed | + | X |  |  |  |
| Bulgaria | 200032 | Screening Failure | - |  |  |  |  |
| Bulgaria | 200033 | Screening Failure | - |  |  |  |  |
| Bulgaria | 200034 | Screening Failure | - |  |  |  |  |
| Bulgaria | 200035 | Completed | + |  | X |  | X |
| Bulgaria | 200036 | Screening Failure | - |  |  |  |  |
| Bulgaria | 200037 | Completed | + |  |  | X | X |
| Bulgaria | 200038 | Screening Failure | - |  |  |  |  |
| Bulgaria | 200039 | Completed | + | X |  |  |  |
| Bulgaria | 200040 | Screening Failure | - |  |  |  |  |
| Bulgaria | 200041 | Screening Failure | - |  |  |  |  |
| Bulgaria | 200042 | Completed | + | X |  |  |  |
| Bulgaria | 200043 | Completed | + |  |  | X | X |
| Bulgaria | 200044 | Screening Failure | - |  |  |  |  |
| Bulgaria | 200045 | Completed | + | X |  |  |  |
| Bulgaria | 200046 | Completed | + |  | X |  | X |
| Bulgaria | 210001 | Screening Failure | - |  |  |  |  |
| Bulgaria | 210002 | Screening Failure | - |  |  |  |  |
| Bulgaria | 210003 | Completed | + |  |  | X |  |
| Bulgaria | 210004 | Completed | + | X |  |  |  |
| Bulgaria | 210005 | Screening Failure | - |  |  |  |  |
| Bulgaria | 210006 | Screening Failure | + |  |  |  | X |
| Bulgaria | 210007 | Screening Failure | - |  |  |  |  |
| Bulgaria | 210008 | Completed | + |  | X |  | X |
| Bulgaria | 210009 | Screening Failure | + |  | X |  | X |
| Bulgaria | 210010 | Screening Failure | - |  |  |  |  |
| Bulgaria | 210011 | Completed | + |  | X |  |  |
| Bulgaria | 210012 | Screening Failure | - |  |  |  |  |
| Bulgaria | 210013 | Completed | + |  | X |  |  |
| Bulgaria | 210014 | Early termination | + |  | X |  |  |
| Bulgaria | 210015 | Screening Failure | - |  |  |  |  |
| Bulgaria | 210016 | Screening Failure | - |  |  |  |  |
| Bulgaria | 210017 | Screening Failure | - |  |  |  |  |
| Bulgaria | 210018 | Early termination | + | X |  |  |  |
| Bulgaria | 210019 | Screening Failure | - |  |  |  |  |
| Bulgaria | 210020 | Screening Failure | - |  |  |  |  |
| Bulgaria | 210021 | Screening Failure | - |  |  |  |  |
| Bulgaria | 210022 | Early termination | + | X | X |  | X |
| Bulgaria | 210023 | Screening Failure | - |  |  |  |  |
| Bulgaria | 210024 | Completed | + |  |  | X |  |
| Bulgaria | 210025 | Screening Failure | - |  |  |  |  |
| Bulgaria | 210026 | Screening Failure | - |  |  |  |  |
| Bulgaria | 210027 | Screening Failure | + | X |  |  |  |
| Bulgaria | 210028 | Completed | + | X |  | X |  |
| Bulgaria | 210029 | Screening Failure | - |  |  |  |  |
| Bulgaria | 210030 | Screening Failure | - |  |  |  |  |
| Bulgaria | 210031 | Screening Failure | - |  |  |  |  |
| Bulgaria | 210032 | Screening Failure | - |  |  |  |  |
| Bulgaria | 210033 | Screening Failure | - |  |  |  |  |
| Bulgaria | 210034 | Screening Failure | - |  |  |  |  |
| Bulgaria | 210035 | Screening Failure | - |  |  |  |  |
| Bulgaria | 210036 | Screening Failure | - |  |  |  |  |
| Bulgaria | 210037 | Screening Failure | - |  |  |  |  |
| Bulgaria | 210038 | Screening Failure | + |  | X |  |  |
| Bulgaria | 210039 | Screening Failure | - |  |  |  |  |
| Bulgaria | 210040 | Screening Failure | + | X |  |  |  |
| Bulgaria | 210041 | Completed | + |  | X |  | X |
| Bulgaria | 210042 | Screening Failure | - |  |  |  |  |
| Bulgaria | 210043 | Screening Failure | + | X |  | X |  |
| Bulgaria | 210044 | Completed | + |  | X |  | X |

| Bulgaria | 210045 | Screening Failure | - |  |  |  |  |
| --- | --- | --- | --- | --- | --- | --- | --- |
| Bulgaria | 210046 | Screening Failure | - |  |  |  |  |
| Bulgaria | 210047 | Screening Failure | - |  |  |  |  |
| Bulgaria | 210048 | Early termination | + | X |  |  |  |
| Bulgaria | 210049 | Screening Failure | - |  |  |  |  |
| Bulgaria | 210050 | Screening Failure | - |  |  |  |  |
| Bulgaria | 210051 | Screening Failure | - |  |  |  |  |
| Bulgaria | 210052 | Screening Failure | - |  |  |  |  |
| Bulgaria | 210053 | Screening Failure | - |  |  |  |  |
| Bulgaria | 210054 | Early termination | + |  |  | X |  |
| Bulgaria | 210055 | Early termination | + |  | X |  | X |
| Bulgaria | 210056 | Screening Failure | - |  |  |  |  |
| Bulgaria | 210057 | Screening Failure | - |  |  |  |  |
| Bulgaria | 210058 | Screening Failure | - |  |  |  |  |
| Bulgaria | 210059 | Screening Failure | - |  |  |  |  |
| Bulgaria | 210060 | Completed | + |  |  |  | X |
| Bulgaria | 210061 | Screening Failure | - |  |  |  |  |
| Bulgaria | 210062 | Screening Failure | - |  |  |  |  |
| Bulgaria | 210063 | Screening Failure | - |  |  |  |  |
| Bulgaria | 210064 | Screening Failure | - |  |  |  |  |
| Bulgaria | 210065 | Screening Failure | - |  |  |  |  |
| Bulgaria | 210066 | Screening Failure | - |  |  |  |  |
| Bulgaria | 210067 | Screening Failure | - |  |  |  |  |
| Bulgaria | 210068 | Screening Failure | + |  | X |  | X |
| Bulgaria | 210069 | Screening Failure | - |  |  |  |  |
| Bulgaria | 210070 | Screening Failure | - |  |  |  |  |
| Bulgaria | 210071 | Screening Failure | - |  |  |  |  |
| Bulgaria | 210072 | Screening Failure | - |  |  |  |  |
| Bulgaria | 210073 | Screening Failure | - |  |  |  |  |
| Bulgaria | 210074 | Screening Failure | + |  | X |  | X |
| Bulgaria | 210075 | Screening Failure | - |  |  |  |  |
| Bulgaria | 210076 | Screening Failure | + | X | X |  | X |
| Bulgaria | 210077 | Screening Failure | - |  |  |  |  |
| Bulgaria | 210078 | Screening Failure | - |  |  |  |  |
| Bulgaria | 210079 | Screening Failure | - |  |  |  |  |
| Bulgaria | 210080 | Screening Failure | - |  |  |  |  |
| Bulgaria | 210081 | Screening Failure | - |  |  |  |  |
| Bulgaria | 210082 | Screening Failure | - |  |  |  |  |
| Bulgaria | 210083 | Screening Failure | - |  |  |  |  |
| Bulgaria | 210084 | Screening Failure | - |  |  |  |  |
| Bulgaria | 210085 | Screening Failure | + |  | X |  | X |
| Bulgaria | 210086 | Screening Failure | + | X |  |  |  |
| Bulgaria | 210087 | Screening Failure | - |  |  |  |  |
| Bulgaria | 210088 | Screening Failure | + |  | X |  |  |
| Bulgaria | 210089 | Screening Failure | - |  |  |  |  |
| Bulgaria | 210090 | Screening Failure | - |  |  |  |  |
| Bulgaria | 210091 | Screening Failure | - |  |  |  |  |
| Bulgaria | 210092 | Screening Failure | - |  |  |  |  |
| Bulgaria | 210093 | Completed | + |  | X |  | X |
| Bulgaria | 210094 | Screening Failure | - |  |  |  |  |
| Bulgaria | 210095 | Screening Failure | - |  |  |  |  |
| Bulgaria | 210096 | Screening Failure | - |  |  |  |  |
| Bulgaria | 210097 | Screening Failure | + | X | X |  | X |
| Bulgaria | 210098 | Completed | + |  |  | X |  |
| Bulgaria | 210099 | Screening Failure | - |  |  |  |  |
| Bulgaria | 210100 | Completed | + |  | X |  | X |
| Bulgaria | 210101 | Screening Failure | - |  |  |  |  |
| Croatia | 220001 | Screening Failure | - |  |  |  |  |
| Croatia | 220002 | Screening Failure | - |  |  |  |  |
| Croatia | 220003 | Completed | + |  | X |  | X |
| Croatia | 220004 | Screening Failure | - |  |  |  |  |
| Croatia | 220005 | Screening Failure | - |  |  |  |  |
| Croatia | 220006 | Completed | + | X |  |  |  |
| Croatia | 220007 | Screening Failure | - |  |  |  |  |
| Croatia | 220008 | Screening Failure | - |  |  |  |  |
| Croatia | 220009 | Screening Failure | - |  |  |  |  |
| Croatia | 220010 | Screening Failure | - |  |  |  |  |
| Croatia | 220011 | Screening Failure | + |  | X |  | X |
| Croatia | 220012 | Completed | + | X |  |  |  |
| Croatia | 220013 | Screening Failure | - |  |  |  |  |
| Croatia | 220014 | Completed | + | X |  |  |  |
| Croatia | 220015 | Screening Failure | + |  | X |  | X |
| Croatia | 220016 | Screening Failure | - |  |  |  |  |
| Croatia | 220017 | Screening Failure | - |  |  |  |  |
| Croatia | 220018 | Screening Failure | + |  | X |  |  |
| Croatia | 220019 | Screening Failure | - |  |  |  |  |
| Croatia | 220020 | Screening Failure | + |  | X |  | X |
| Croatia | 220021 | Completed | + |  |  |  | X |
| Croatia | 220022 | Early termination | + | X |  |  |  |
| Croatia | 220023 | Screening Failure | - |  |  |  |  |
| Croatia | 220024 | Screening Failure | - |  |  |  |  |
| Croatia | 220025 | Early termination | + | X |  |  |  |
| Croatia | 220026 | Screening Failure | - |  |  |  |  |
| Croatia | 220027 | Screening Failure | - |  |  |  |  |
| Croatia | 220028 | Screening Failure | - |  |  |  |  |
| Croatia | 220029 | Screening Failure | ND |  |  |  |  |
| Croatia | 220030 | Completed | + |  | X |  | X |
| Croatia | 220031 | Screening Failure | - |  |  |  |  |
| Croatia | 220032 | Early termination | + | X |  |  |  |
| Croatia | 220033 | Completed | + |  | X |  | X |
| Croatia | 220034 | Screening Failure | - |  |  |  |  |
| Croatia | 220035 | Screening Failure | + |  |  | X |  |
| Croatia | 220036 | Screening Failure | + | X |  |  |  |
| Croatia | 230001 | Screening Failure | - |  |  |  |  |
| Croatia | 230002 | Completed | + | X |  |  |  |
| Croatia | 230003 | Screening Failure | - |  |  |  |  |
| Croatia | 230004 | Screening Failure | - |  |  |  |  |
| Croatia | 230005 | Screening Failure | - |  |  |  |  |
| Croatia | 230006 | Screening Failure | - |  |  |  |  |
| Croatia | 230007 | Screening Failure | + |  |  | X |  |
| Croatia | 230008 | Screening Failure | + |  | X |  |  |
| Croatia | 230009 | Screening Failure | - |  |  |  |  |
| Croatia | 230010 | Screening Failure | - |  |  |  |  |
| Croatia | 230011 | Screening Failure | ND |  |  |  |  |
| Croatia | 230012 | Screening Failure | + |  | X |  |  |
| Croatia | 230013 | Screening Failure | ND |  |  |  |  |
| Croatia | 230014 | Screening Failure | + |  | X |  | X |
| Croatia | 230015 | Screening Failure | + | X |  |  |  |
| Croatia | 240001 | Screening Failure | - |  |  |  |  |
| Croatia | 240002 | Screening Failure | - |  |  |  |  |
| Croatia | 240003 | Screening Failure | - |  |  |  |  |
| Croatia | 240004 | Screening Failure | - |  |  |  |  |
| Croatia | 240005 | Screening Failure | - |  |  |  |  |
| Croatia | 240006 | Screening Failure | - |  |  |  |  |
| Croatia | 240007 | Screening Failure | + | X |  |  |  |
| Croatia | 240008 | Screening Failure | + | X |  |  |  |
| Croatia | 240009 | Screening Failure | - |  |  |  |  |
| Croatia | 240010 | Screening Failure | + |  | X |  | X |
| Croatia | 240011 | Screening Failure | - |  |  |  |  |
| Croatia | 240012 | Screening Failure | + |  | X |  | X |
| Croatia | 240013 | Screening Failure | - |  |  |  |  |
| Croatia | 240014 | Completed | + | X |  |  |  |
| Croatia | 240015 | Screening Failure | - |  |  |  |  |
| Finland | 260001 | Screening Failure | - |  |  |  |  |
| Finland | 260002 | Screening Failure | - |  |  |  |  |
| Finland | 260003 | Screening Failure | - |  |  |  |  |
| Finland | 260004 | Screening Failure | - |  |  |  |  |
| Finland | 260005 | Screening Failure | - |  |  |  |  |
| Finland | 260006 | Screening Failure | - |  |  |  |  |
| Finland | 260007 | Screening Failure | - |  |  |  |  |
| Finland | 260008 | Screening Failure | + |  |  |  | X |
| Finland | 260009 | Completed | + | X |  |  |  |
| Finland | 260010 | Screening Failure | - |  |  |  |  |
| Finland | 260011 | Screening Failure | - |  |  |  |  |
| Finland | 260012 | Screening Failure | ND |  |  |  |  |
| Finland | 260013 | Screening Failure | - |  |  |  |  |
| Finland | 260014 | Screening Failure | - |  |  |  |  |
| Finland | 260015 | Screening Failure | - |  |  |  |  |
| Finland | 260016 | Screening Failure | - |  |  |  |  |
| Finland | 260017 | Screening Failure | - |  |  |  |  |
| Finland | 260018 | Screening Failure | - |  |  |  |  |
| Finland | 260019 | Early termination | + | X |  |  |  |
| Finland | 260020 | Screening Failure | - |  |  |  |  |
| Finland | 260021 | Screening Failure | - |  |  |  |  |
| Finland | 260022 | Screening Failure | - |  |  |  |  |
| Finland | 260023 | Screening Failure | - |  |  |  |  |
| Finland | 260024 | Screening Failure | - |  |  |  |  |
| Finland | 260025 | Screening Failure | - |  |  |  |  |
| Finland | 260026 | Screening Failure | ND |  |  |  |  |
| Finland | 260027 | Screening Failure | - |  |  |  |  |
| Finland | 260028 | Screening Failure | - |  |  |  |  |
| Finland | 260029 | Screening Failure | + | X |  | X |  |
| Finland | 260030 | Screening Failure | - |  |  |  |  |
| Finland | 260031 | Screening Failure | - |  |  |  |  |
| Finland | 260032 | Completed | + | X |  | X |  |
| Finland | 260033 | Completed | + |  |  | X |  |
| Finland | 260034 | Completed | + | X |  |  |  |
| Finland | 260035 | Screening Failure | - |  |  |  |  |
| Finland | 260036 | Screening Failure | - |  |  |  |  |
| Finland | 260037 | Completed | + | X |  |  |  |
| Bulgaria | 270001 | Screening Failure | + |  |  |  | X |
| Bulgaria | 270002 | Completed | + |  | X |  | X |
| Bulgaria | 270003 | Screening Failure | - |  |  |  |  |
| Bulgaria | 270004 | Screening Failure | + |  | X |  | X |
| Bulgaria | 270005 | Screening Failure | - |  |  |  |  |
| Bulgaria | 270006 | Screening Failure | + |  | X |  | X |
| Bulgaria | 270007 | Screening Failure | - |  |  |  |  |
| Bulgaria | 270008 | Screening Failure | - |  |  |  |  |
| Bulgaria | 270009 | Screening Failure | - |  |  |  |  |
| Bulgaria | 270010 | Screening Failure | - |  |  |  |  |
| Bulgaria | 270011 | Early termination | + | X |  |  |  |
| Bulgaria | 270012 | Screening Failure | - |  |  |  |  |
| Bulgaria | 270013 | Screening Failure | - |  |  |  |  |
| Bulgaria | 270014 | Screening Failure | - |  |  |  |  |
| Bulgaria | 270015 | Screening Failure | - |  |  |  |  |
| Sweden | 280001 | Screening Failure | ND |  |  |  |  |
| Sweden | 280002 | Screening Failure | - |  |  |  |  |
| Sweden | 280003 | Completed | + | X | X |  |  |
| Sweden | 280004 | Screening Failure | - |  |  |  |  |
| Sweden | 280005 | Screening Failure | ND |  |  |  |  |
| Sweden | 280006 | Screening Failure | - |  |  |  |  |
| Sweden | 280007 | Screening Failure | ND |  |  |  |  |
| Sweden | 280008 | Screening Failure | - |  |  |  |  |
| Sweden | 280009 | Screening Failure | ND |  |  |  |  |
| Sweden | 280010 | Screening Failure | ND |  |  |  |  |
| Sweden | 280011 | Screening Failure | ND |  |  |  |  |
| Sweden | 280012 | Screening Failure | ND |  |  |  |  |
| Sweden | 280013 | Completed | + | X |  |  |  |
| Sweden | 280014 | Screening Failure | ND |  |  |  |  |
| Sweden | 280015 | Screening Failure | - |  |  |  |  |
| Sweden | 280016 | Screening Failure | - |  |  |  |  |
| Sweden | 280017 | Screening Failure | ND |  |  |  |  |
| Sweden | 280018 | Screening Failure | - |  |  |  |  |
| Sweden | 280019 | Screening Failure | - |  |  |  |  |
| Sweden | 280020 | Early termination | + |  |  | X |  |
| Sweden | 280021 | Screening Failure | ND |  |  |  |  |
| Sweden | 280022 | Screening Failure | ND |  |  |  |  |
| Sweden | 280023 | Screening Failure | ND |  |  |  |  |
| Sweden | 280024 | Screening Failure | ND |  |  |  |  |
| Sweden | 280025 | Screening Failure | - |  |  |  |  |
| Sweden | 280026 | Screening Failure | ND |  |  |  |  |
| Sweden | 280027 | Screening Failure | ND |  |  |  |  |
| Sweden | 280028 | Screening Failure | + | X |  |  |  |
| Sweden | 280029 | Screening Failure | + | X |  |  |  |
| Sweden | 280030 | Screening Failure | - |  |  |  |  |
| Sweden | 280031 | Screening Failure | ND |  |  |  |  |
| Sweden | 280032 | Screening Failure | ND |  |  |  |  |
| Sweden | 280033 | Screening Failure | ND |  |  |  |  |
| Sweden | 280034 | Completed | + | X |  |  |  |
| Sweden | 280035 | Screening Failure | ND |  |  |  |  |
| Sweden | 280036 | Screening Failure | - |  |  |  |  |
| Sweden | 280037 | Completed | + |  |  | X |  |
| Sweden | 280038 | Screening Failure | - |  |  |  |  |
| Sweden | 280039 | Screening Failure | ND |  |  |  |  |
| Sweden | 280040 | Screening Failure | - |  |  |  |  |
| Sweden | 280041 | Screening Failure | + |  | X |  | X |
| Sweden | 280042 | Screening Failure | - |  |  |  |  |
| Sweden | 280043 | Screening Failure | + | X |  |  |  |
| Sweden | 280044 | Screening Failure | - |  |  |  |  |
| Sweden | 280045 | Screening Failure | - |  |  |  |  |
| Sweden | 280046 | Screening Failure | ND |  |  |  |  |
| Sweden | 280047 | Screening Failure | - |  |  |  |  |
| Sweden | 280048 | Screening Failure | - |  |  |  |  |
| Sweden | 280049 | Screening Failure | - |  |  |  |  |
| Sweden | 280050 | Early termination | + | X |  |  |  |
| Sweden | 280051 | Early termination | + | X |  |  |  |
| Sweden | 280052 | Screening Failure | ND |  |  |  |  |
| Sweden | 280053 | Completed | + |  | X |  | X |
| Sweden | 280054 | Screening Failure | - |  |  |  |  |
| Sweden | 280055 | Screening Failure | ND |  |  |  |  |
| Sweden | 280056 | Early termination | + |  | X |  |  |
| Sweden | 280057 | Screening Failure | ND |  |  |  |  |
| Sweden | 280058 | Screening Failure | ND |  |  |  |  |
| Sweden | 280059 | Screening Failure | - |  |  |  |  |
| Sweden | 280060 | Screening Failure | ND |  |  |  |  |
| Sweden | 280061 | Screening Failure | - |  |  |  |  |
| Sweden | 280062 | Screening Failure | ND |  |  |  |  |
| Sweden | 280063 | Screening Failure | - |  |  |  |  |
| Sweden | 280064 | Screening Failure | - |  |  |  |  |
| Sweden | 280065 | Screening Failure | - |  |  |  |  |
| Sweden | 280066 | Completed | + |  |  | X |  |
| Sweden | 280067 | Screening Failure | ND |  |  |  |  |
| Poland | 290001 | Early termination | + |  | X |  |  |
| Poland | 290002 | Screening Failure | - |  |  |  |  |
| Poland | 290003 | Screening Failure | - |  |  |  |  |
| Poland | 290004 | Screening Failure | - |  |  |  |  |
| Poland | 290005 | Screening Failure | - |  |  |  |  |
| Poland | 290006 | Screening Failure | - |  |  |  |  |
| Poland | 290007 | Early termination | + |  |  | X |  |
| Poland | 290008 | Screening Failure | - |  |  |  |  |
| Poland | 290009 | Screening Failure | - |  |  |  |  |
| Poland | 290010 | Screening Failure | + |  | X |  | X |
| Poland | 290011 | Screening Failure | - |  |  |  |  |
| Poland | 290012 | Screening Failure | - |  |  |  |  |
| Poland | 290013 | Screening Failure | - |  |  |  |  |
| Poland | 290014 | Screening Failure | + | X |  |  |  |
| Poland | 290015 | Screening Failure | - |  |  |  |  |
| Poland | 290016 | Screening Failure | - |  |  |  |  |
| Poland | 290017 | Screening Failure | - |  |  |  |  |
| Poland | 290018 | Screening Failure | - |  |  |  |  |
| Poland | 290019 | Screening Failure | + |  |  |  | X |
| Poland | 290020 | Screening Failure | + |  | X |  | X |
| Poland | 290021 | Screening Failure | - |  |  |  |  |
| Poland | 290023 | Early termination | + |  | X |  | X |
| Latvia | 310001 | Screening Failure | - |  |  |  |  |
| Latvia | 310002 | Screening Failure | - |  |  |  |  |
| Latvia | 310003 | Screening Failure | - |  |  |  |  |
| Latvia | 310004 | Screening Failure | ND |  |  |  |  |
| Latvia | 310005 | Screening Failure | - |  |  |  |  |
| Latvia | 310006 | Screening Failure | - |  |  |  |  |
| Latvia | 310007 | Early termination | + | X | X |  |  |
| Latvia | 310008 | Screening Failure | - |  |  |  |  |
| Latvia | 310009 | Screening Failure | ND |  |  |  |  |
| Latvia | 310010 | Completed | + |  |  |  | X |
| Latvia | 310011 | Completed | + |  | X |  |  |
| Latvia | 310012 | Screening Failure | - |  |  |  |  |
| Latvia | 310013 | Completed | + |  | X |  | X |
| Latvia | 310014 | Screening Failure | - |  |  |  |  |
| Latvia | 310015 | Completed | + | X |  |  |  |
| Latvia | 310016 | Screening Failure | - |  |  |  |  |
| Latvia | 310017 | Completed | + |  | X |  | X |
| Latvia | 310018 | Screening Failure | - |  |  |  |  |
| Latvia | 310019 | Completed | + |  | X |  | X |
| Latvia | 310020 | Screening Failure | + |  | X |  | X |
| Latvia | 310021 | Screening Failure | - |  |  |  |  |
| Latvia | 310022 | Screening Failure | - |  |  |  |  |
| Latvia | 310023 | Screening Failure | - |  |  |  |  |
| Latvia | 310024 | Screening Failure | - |  |  |  |  |
| Latvia | 310025 | Screening Failure | - |  |  |  |  |
| Latvia | 310026 | Completed | + | X | X |  | X |
| Latvia | 310027 | Screening Failure | - |  |  |  |  |
| Latvia | 310028 | Early termination | + |  | X |  |  |
| Latvia | 310029 | Completed | + |  | X |  | X |
| Latvia | 310030 | Screening Failure | - |  |  |  |  |
| Latvia | 310031 | Early termination | + |  | X |  |  |
| Latvia | 310032 | Screening Failure | - |  |  |  |  |
| Latvia | 310033 | Completed | + |  | X |  | X |
| Latvia | 310034 | Screening Failure | - |  |  |  |  |
| Latvia | 310035 | Screening Failure | - |  |  |  |  |
| Latvia | 320001 | Screening Failure | + | X |  |  |  |
| Bulgaria | 330001 | Screening Failure | - |  |  |  |  |
| Bulgaria | 330002 | Screening Failure | - |  |  |  |  |
| Bulgaria | 330003 | Screening Failure | + |  | X |  | X |
| Bulgaria | 330004 | Screening Failure | - |  |  |  |  |
| Bulgaria | 330005 | Screening Failure | - |  |  |  |  |
| Bulgaria | 330006 | Screening Failure | - |  |  |  |  |
| Bulgaria | 330007 | Screening Failure | - |  |  |  |  |
| Bulgaria | 330008 | Screening Failure | - |  |  |  |  |
| Bulgaria | 330009 | Screening Failure | - |  |  |  |  |
| Bulgaria | 330010 | Screening Failure | ND |  |  |  |  |
| Bulgaria | 330011 | Completed | + |  | X |  | X |
| Bulgaria | 330012 | Screening Failure | - |  |  |  |  |
| Bulgaria | 330013 | Screening Failure | - |  |  |  |  |
| Bulgaria | 330014 | Screening Failure | - |  |  |  |  |
| Bulgaria | 330015 | Screening Failure | - |  |  |  |  |
| Bulgaria | 330016 | Completed | + | X |  |  |  |
| Bulgaria | 340001 | Completed | + | X |  |  |  |
| Bulgaria | 340002 | Early termination | + |  | X |  | X |
| Bulgaria | 340003 | Screening Failure | - |  |  |  |  |
| Bulgaria | 340004 | Early termination | + | X |  |  |  |
| Bulgaria | 340005 | Screening Failure | - |  |  |  |  |
| Bulgaria | 340006 | Screening Failure | - |  |  |  |  |
| Bulgaria | 340007 | Screening Failure | - |  |  |  |  |
| Bulgaria | 340008 | Screening Failure | - |  |  |  |  |
| Bulgaria | 340009 | Screening Failure | - |  |  |  |  |
| Bulgaria | 340010 | Screening Failure | - |  |  |  |  |
| Bulgaria | 340011 | Screening Failure | - |  |  |  |  |
| Bulgaria | 340012 | Screening Failure | - |  |  |  |  |
| Bulgaria | 340013 | Screening Failure | - |  |  |  |  |
| Bulgaria | 340014 | Screening Failure | - |  |  |  |  |
| Bulgaria | 340015 | Screening Failure | - |  |  |  |  |
| Bulgaria | 340016 | Screening Failure | - |  |  |  |  |
| Bulgaria | 340017 | Screening Failure | - |  |  |  |  |
| Bulgaria | 340018 | Early termination | + |  |  | X |  |
| Bulgaria | 340019 | Screening Failure | - |  |  |  |  |
| Bulgaria | 340020 | Screening Failure | - |  |  |  |  |

# ANALYSES WITH FEMALE SUBJECTS STRATIFIED USING <6 DDD OR ≥6 DDD

First, we created a new variable: the difference between the monthly PHDD and the baseline PHDD, and used it as the outcome of interest. We ran a mixed effects model with the following variables: treatment, visit (as category 1-6), treatment * visit interaction, drinks per drinking day (DDD) at randomization (new definition: DDD<6 for female and DDD<10 for male), and gender, and baseline PHDD. We included a random intercept to account for the repeated measures of PHDD on the same subject. We adopted the unstructured covariance matrix for the repeated measures. Restricted maximum likelihood estimation and the Kenward-Roger approximation for degrees of freedom were employed to estimate the model.

The table below shows the results. We can see that the main effect of treatment and the interaction of treatment * visit are not significant.

Supplementary Table 8. SAS ANOVA Table for New Definition of DDD at Randomization

| **Type 3 Tests of Fixed Effects** | | | | |
| --- | --- | --- | --- | --- |
| **Effect** | **Num DF** | **Den DF** | **F Value** | **Pr > F** |
| **Treatment** | 1 | 286 | 0.31 | 0.5760 |
| **Visit Month** | 5 | 242 | 23.89 | <.0001 |
| **Visit Month * Treatment** | 5 | 242 | 1.38 | 0.2337 |
| **DDD Stratification** | 1 | 290 | 1.93 | 0.1662 |
| **Gender** | 1 | 289 | 4.99 | 0.0262 |
| **Baseline PHDD** | 1 | 291 | 76.69 | <.0001 |

We then conducted a contrast of treatment vs. placebo in the PHDD of Months 5 & 6. Below we can see that although the difference in PHDD is 2.0% between treatment and placebo, the difference is not significant (p=0.55).

Supplementary Table 9. LSM Estimate of Change in PHDD of Months 5 & 6 for New Definition of DDD at Randomization: AD04 vs. Placebo

| **Least Squares Means Estimate** | | | | | | |
| --- | --- | --- | --- | --- | --- | --- |
| **Effect** | **Label** | **Estimate** | **Standard Error** | **DF** | **t Value** | **Pr > |t|** |
| **Visit Month * Treatment** | **Month 5 & 6 Trt vs. Placebo** | 2.0092 | 3.3842 | 263.6 | 0.59 | 0.5532 |

We then did a contrast of treatment vs. placebo in the PHDD of Month 5 only. Below we can see that although the difference in PHDD is 1.2% between treatment and placebo, the difference is not significant (p=0.72).

Supplementary Table 10. LSM Estimate of Change in PHDD of Month 5 for New Definition of DDD at Randomization: AD04 vs. Placebo

| **Least Squares Means Estimate** | | | | | | |
| --- | --- | --- | --- | --- | --- | --- |
| **Effect** | **Label** | **Estimate** | **Standard Error** | **DF** | **t Value** | **Pr > |t|** |
| **Visit Month * Treatment** | **Month 5 Trt vs. Placebo** | 1.2409 | 3.4841 | 262.8 | 0.36 | 0.7220 |

Next, we conducted a contrast of treatment vs. placebo in the PHDD of Month 6 only. Below we can see that although the difference in PHDD is 2.8% between treatment and placebo, the difference is not significant (p=0.43).

Supplementary Table 11. LSM Estimate of Change in PHDD of Month 6 for New Definition of DDD at Randomization: AD04 vs. Placebo

| **Least Squares Means Estimate** | | | | | | |
| --- | --- | --- | --- | --- | --- | --- |
| **Effect** | **Label** | **Estimate** | **Standard Error** | **DF** | **t Value** | **Pr > |t|** |
| **Visit Month * Treatment** | **Month 6 Trt vs. Placebo** | 2.7775 | 3.4840 | 262 | 0.80 | 0.4260 |

We can see the LS means of each combination of treatment and visit in the following table.

Supplementary Table 12. LSM Estimates of Change in PHDD for New Definition of DDD at Randomization

| **Least Squares Means** | | | | | | | |
| --- | --- | --- | --- | --- | --- | --- | --- |
| **Effect** | **Visit Month** | **Planned Treatment** | **Estimate** | **Standard Error** | **DF** | **t Value** | **Pr > |t|** |
| **Visit Month * Treatment** | **1** | **AD04** | -31.2187 | 2.3727 | 298 | -13.16 | <.0001 |
| **Visit Month * Treatment** | **1** | **Placebo** | -25.3627 | 2.4505 | 299 | -10.35 | <.0001 |
| **Visit Month * Treatment** | **2** | **AD04** | -35.0114 | 2.5334 | 299 | -13.82 | <.0001 |
| **Visit Month * Treatment** | **2** | **Placebo** | -33.7663 | 2.6376 | 305 | -12.80 | <.0001 |
| **Visit Month * Treatment** | **3** | **AD04** | -37.6612 | 2.5900 | 298 | -14.54 | <.0001 |
| **Visit Month * Treatment** | **3** | **Placebo** | -37.5308 | 2.6923 | 298 | -13.94 | <.0001 |
| **Visit Month * Treatment** | **4** | **AD04** | -40.4885 | 2.6026 | 283 | -15.56 | <.0001 |
| **Visit Month * Treatment** | **4** | **Placebo** | -41.4407 | 2.7096 | 282 | -15.29 | <.0001 |
| **Visit Month * Treatment** | **5** | **AD04** | -44.6222 | 2.5084 | 274 | -17.79 | <.0001 |
| **Visit Month * Treatment** | **5** | **Placebo** | -43.3813 | 2.6075 | 273 | -16.64 | <.0001 |
| **Visit Month * Treatment** | **6** | **AD04** | -46.6039 | 2.5113 | 272 | -18.56 | <.0001 |
| **Visit Month * Treatment** | **6** | **Placebo** | -43.8265 | 2.6043 | 272 | -16.83 | <.0001 |

**S****ubgroup Analysis: Heavy** **(****DDD<6 for female (N=50) and DDD<10 for male (N=131))**

We then conducted the subgroup analysis on DDD at randomization for the heavy drinkers group:

Supplementary Table 13. SAS ANOVA Table for New Definition of DDD at Randomization: Heavy Drinkers

| **Type 3 Tests of Fixed Effects** | | | | |
| --- | --- | --- | --- | --- |
| **Effect** | **Num DF** | **Den DF** | **F Value** | **Pr > F** |
| **Treatment** | 1 | 167 | 0.87 | 0.3516 |
| **Visit Month** | 5 | 138 | 13.95 | <.0001 |
| **Visit Month * Treatment** | 5 | 138 | 0.78 | 0.5685 |
| **Gender** | 1 | 169 | 3.07 | 0.0815 |
| **Baseline PHDD** | 1 | 171 | 64.84 | <.0001 |

For the heavy drinking group, we can see the contrast of treatment vs. placebo in the PHDD of Months 5 & 6 is 4.5%, which is significant (p=0.27).

Supplementary Table 14. LSM Estimate of Change in PHDD of Months 5 & 6 for New Definiton of DDD at Randomization: AD04 vs. Placebo for Heavy Drinkers

| **Least Squares Means Estimate** | | | | | | |
| --- | --- | --- | --- | --- | --- | --- |
| **Effect** | **Label** | **Estimate** | **Standard Error** | **DF** | **t Value** | **Pr > |t|** |
| **Visit Month * Treatment** | **Month 5 & 6 Trt vs. Placebo** | 4.4808 | 4.0819 | 155.9 | 1.10 | 0.2740 |

We can see the contrast of treatment vs. placebo in the PHDD of Month 5 is 3.1%, which is marginally significant (p=0.45).

Supplementary Table 15. LSM Estimate of Change in PHDD of Month 5 for New Definiton of DDD at Randomization: AD04 vs. Placebo for Heavy Drinkers

| **Least Squares Means Estimate** | | | | | | |
| --- | --- | --- | --- | --- | --- | --- |
| **Effect** | **Label** | **Estimate** | **Standard Error** | **DF** | **t Value** | **Pr > |t|** |
| **Visit Month * Treatment** | **Month 5 Trt vs. Placebo** | 3.1265 | 4.1492 | 155.2 | 0.75 | 0.4523 |

We can see the contrast of treatment vs. placebo in the PHDD of Month 6 is 5.8%, which is marginally significant (p=0.17).

Supplementary Table 16. LSM Estimate of Change in PHDD of Month 6 for New Definiton of DDD at Randomization: AD04 vs. Placebo for Heavy Drinkers

| **Least Squares Means Estimate** | | | | | | |
| --- | --- | --- | --- | --- | --- | --- |
| **Effect** | **Label** | **Estimate** | **Standard Error** | **DF** | **t Value** | **Pr > |t|** |
| **Visit Month * Treatment** | **Month 6 Trt vs. Placebo** | 5.8351 | 4.2264 | 154.7 | 1.38 | 0.1694 |

We can see the LS means of each combination of treatment and visit in the following table.

Supplementary Table 17. LSM Estimates of Change in PHDD for New Definition of DDD at Randomization for Heavy Drinkers

| **Least Squares Means** | | | | | | | |
| --- | --- | --- | --- | --- | --- | --- | --- |
| **Effect** | **Visit Month** | **Planned Treatment** | **Estimate** | **Standard Error** | **DF** | **t Value** | **Pr > |t|** |
| **Visit Month * Treatment** | **1** | **AD04** | -31.7850 | 2.9775 | 181 | -10.67 | <.0001 |
| **Visit Month * Treatment** | **1** | **Placebo** | -25.9657 | 3.1330 | 180 | -8.29 | <.0001 |
| **Visit Month * Treatment** | **2** | **AD04** | -34.6882 | 3.1181 | 174 | -11.12 | <.0001 |
| **Visit Month * Treatment** | **2** | **Placebo** | -32.0270 | 3.3282 | 179 | -9.62 | <.0001 |
| **Visit Month * Treatment** | **3** | **AD04** | -37.0491 | 3.2445 | 172 | -11.42 | <.0001 |
| **Visit Month * Treatment** | **3** | **Placebo** | -34.9076 | 3.4679 | 173 | -10.07 | <.0001 |
| **Visit Month * Treatment** | **4** | **AD04** | -40.5812 | 3.2555 | 165 | -12.47 | <.0001 |
| **Visit Month * Treatment** | **4** | **Placebo** | -38.6560 | 3.4991 | 165 | -11.05 | <.0001 |
| **Visit Month * Treatment** | **5** | **AD04** | -44.6041 | 2.9653 | 160 | -15.04 | <.0001 |
| **Visit Month * Treatment** | **5** | **Placebo** | -41.4775 | 3.1709 | 160 | -13.08 | <.0001 |
| **Visit Month * Treatment** | **6** | **AD04** | -47.0317 | 3.0164 | 160 | -15.59 | <.0001 |
| **Visit Month * Treatment** | **6** | **Placebo** | -41.1965 | 3.2218 | 160 | -12.79 | <.0001 |

**Subgroup Analysis:** **Severe Heavy** **(DDD≥6 for female (N=37) and DDD≥10 for male (N=85))**

We then conducted the subgroup analysis on DDD at randomization for the severe heavy drinkers group:

Supplementary Table 18. SAS ANOVA Table for New Definition of DDD at Randomization: Severe Heavy Drinkers

| **Type 3 Tests of Fixed Effects** | | | | |
| --- | --- | --- | --- | --- |
| **Effect** | **Num DF** | **Den DF** | **F Value** | **Pr > F** |
| **Treatment** | 1 | 114 | 0.00 | 0.9485 |
| **Visit Month** | 5 | 96.8 | 11.36 | <.0001 |
| **Visit Month * Treatment** | 5 | 96.8 | 1.09 | 0.3724 |
| **Gender** | 1 | 117 | 3.21 | 0.0758 |
| **Baseline PHDD** | 1 | 116 | 13.46 | 0.0004 |

We can see the contrast of treatment vs. placebo in the PHDD of Months 5 & 6 is -1.2%, i.e., placebo is better than treatment in reducing the PHDD, although the effect is not significant (p=0.84).

Supplementary Table 19. LSM Estimate of Change in PHDD of Months 5 & 6 for New Definition of DDD at Randomization: AD04 vs. Placebo for Severe Heavy Drinkers

| **Least Squares Means Estimate** | | | | | | |
| --- | --- | --- | --- | --- | --- | --- |
| **Effect** | **Label** | **Estimate** | **Standard Error** | **DF** | **t Value** | **Pr > |t|** |
| **Visit Month * Treatment** | **Month 5 & 6 Trt vs. Placebo** | -1.2058 | 6.0055 | 99.59 | -0.20 | 0.8413 |

We can see the contrast of treatment vs. placebo in the PHDD of Month 5 is -1.2%, i.e., placebo is better than treatment in reducing the PHDD, although the effect is not significant (p=0.85).

Supplementary Table 20. LSM Estimate of Change in PHDD of Month 5 for New Definiton of DDD at Randomization: AD04 vs. Placebo for Severe Heavy Drinkers

| **Least Squares Means Estimate** | | | | | | |
| --- | --- | --- | --- | --- | --- | --- |
| **Effect** | **Label** | **Estimate** | **Standard Error** | **DF** | **t Value** | **Pr > |t|** |
| **Visit Month * Treatment** | **Month 5 Trt vs. Placebo** | -1.1791 | 6.2857 | 99.79 | -0.19 | 0.8516 |

We can see the contrast of treatment vs. placebo in the PHDD of Month 6 is -1.2%, i.e., placebo is better than treatment in reducing the PHDD, although the effect is not significant (p=0.84).

Supplementary Table 21. LSM Estimate of Change in PHDD of Month 6 for New Definiton of DDD at Randomization: AD04 vs. Placebo for Severe Heavy Drinkers

| **Least Squares Means Estimate** | | | | | | |
| --- | --- | --- | --- | --- | --- | --- |
| **Effect** | **Label** | **Estimate** | **Standard Error** | **DF** | **t Value** | **Pr > |t|** |
| **Visit Month * Treatment** | **Month 6 Trt vs. Placebo** | -1.2325 | 6.1143 | 99.54 | -0.20 | 0.8407 |

Below we list the LS means of each combination of Visit and Treatment.

Supplementary Table 22. LSM Estimates of Change in PHDD for New Definiton of DDD at Randomization for Severe Heavy Drinkers

| **Least Squares Means** | | | | | | | |
| --- | --- | --- | --- | --- | --- | --- | --- |
| **Effect** | **Visit Month** | **Planned Treatment** | **Estimate** | **Standard Error** | **DF** | **t Value** | **Pr > |t|** |
| **Visit Month * Treatment** | **1** | **AD04** | -30.0337 | 3.8764 | 116 | -7.75 | <.0001 |
| **Visit Month * Treatment** | **1** | **Placebo** | -23.7597 | 3.8977 | 117 | -6.10 | <.0001 |
| **Visit Month * Treatment** | **2** | **AD04** | -35.3323 | 4.2423 | 119 | -8.33 | <.0001 |
| **Visit Month * Treatment** | **2** | **Placebo** | -35.3312 | 4.2575 | 121 | -8.30 | <.0001 |
| **Visit Month * Treatment** | **3** | **AD04** | -38.5551 | 4.2641 | 120 | -9.04 | <.0001 |
| **Visit Month * Treatment** | **3** | **Placebo** | -40.1952 | 4.2640 | 120 | -9.43 | <.0001 |
| **Visit Month * Treatment** | **4** | **AD04** | -40.0811 | 4.3375 | 114 | -9.24 | <.0001 |
| **Visit Month * Treatment** | **4** | **Placebo** | -44.2778 | 4.3057 | 113 | -10.28 | <.0001 |
| **Visit Month * Treatment** | **5** | **AD04** | -43.9159 | 4.6101 | 105 | -9.53 | <.0001 |
| **Visit Month * Treatment** | **5** | **Placebo** | -45.0949 | 4.5487 | 105 | -9.91 | <.0001 |
| **Visit Month * Treatment** | **6** | **AD04** | -45.3506 | 4.4909 | 104 | -10.10 | <.0001 |
| **Visit Month * Treatment** | **6** | **Placebo** | -46.5831 | 4.4325 | 105 | -10.51 | <.0001 |

# CORRELATIONAL ANALYSES FOR PHDD

## All Subjects

We calculated the correlation between PHDD in Month 1 and Month 6: the correlation is 0.69 (p<0.0001). That is, a lower PHDD level in Month 1 is associated with a lower PHDD level in Month 6.

Supplementary Figure 1. Correlational Analysis for PHDD, All Subjects


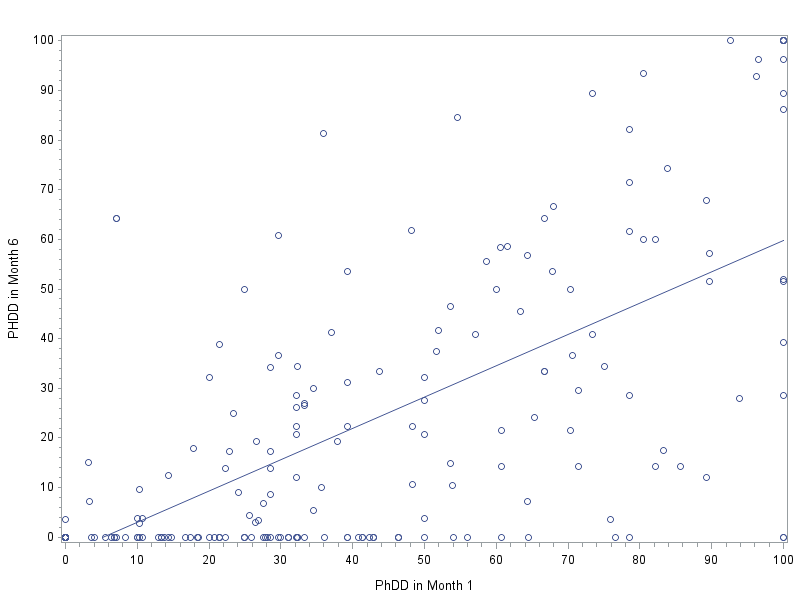


Among the AD04 group, PHDD in Month 1 and Month 6 has a correlation of 0.75 (p < 0.0001).

Among the placebo group, PHDD in Month 1 and Month 6 has a correlation of 0.62 (p < 0.0001).

To test whether the correlation is the same between the two treatment arms, we did a regression analysis with 3 covariates: PHDD in Month 1, treatment, and their interaction. The correlation can be tested using the interaction term. In the first analysis on the correlation between PHDD in Month 1 and Month 6, the interaction term is not significant (p = 0.40). As shown in the figure below, the slopes of the two lines are quite similar.

Supplementary Figure 2. Correlational Analysis for PHDD by Treatment, All Subjects


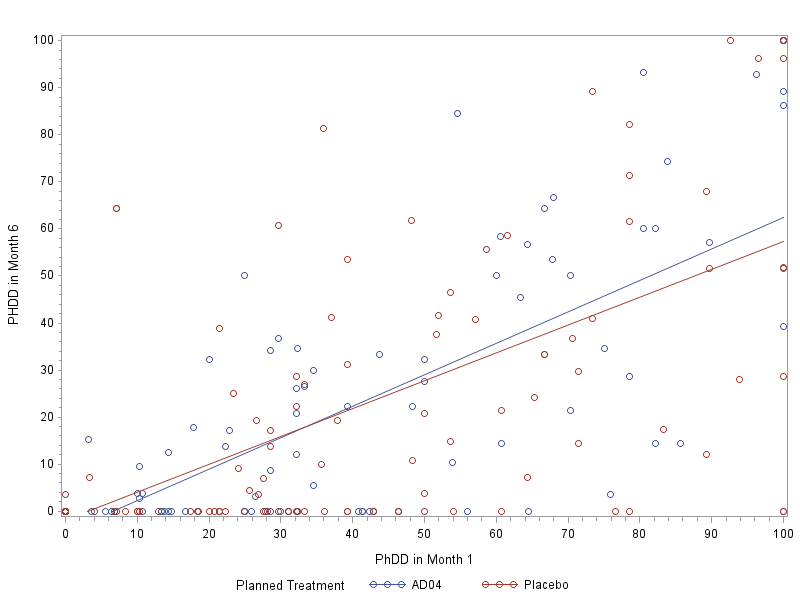


## Heavy Drinkers (<10 DDD)

We calculated the correlation between PHDD in Month 1 and Month 6: the correlation is 0.73 (p<0.0001). That is, a lower PHDD level in Month 1 is associated with a lower PHDD level in Month 6.

Supplementary Figure 3. Correlational Analysis for PHDD, Heavy Drinkers


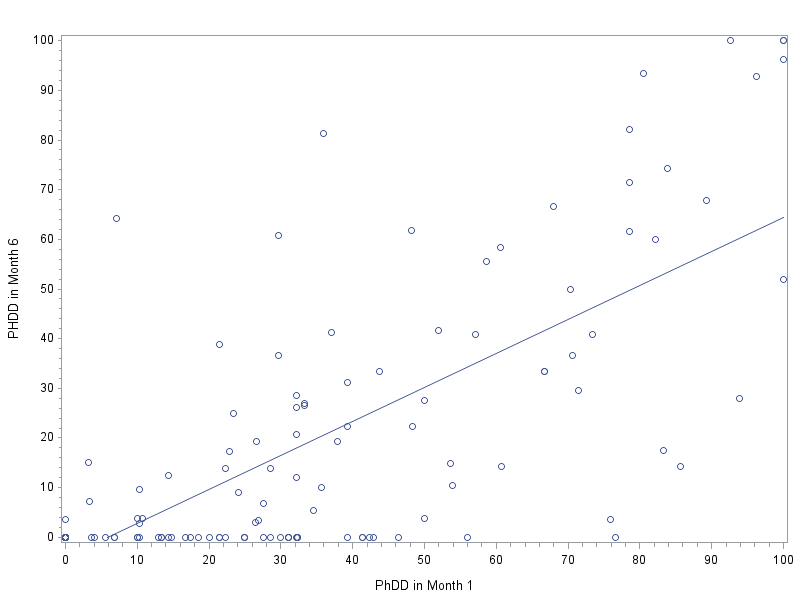


Among the AD04 group, PHDD in Month 1 and Month 6 has a correlation of 0.76 (p<0.0001).

Among the placebo group, PHDD in Month 1 and Month 6 has a correlation of 0.70 (p<0.0001).

To test whether the correlation is the same between the two treatment arms, we did a regression analysis with 3 covariates: PHDD in Month 1, treatment, and their interaction. The correlation can be tested using the interaction term. In the first analysis on the correlation between PHDD in Month 1 and Month 6, the p-value for the interaction term is 0.91. As shown in the figure below, the slopes of the two lines are quite similar.

Supplementary Figure 4. Correlational Analysis for PHDD by Treatment, Heavy Drinkers


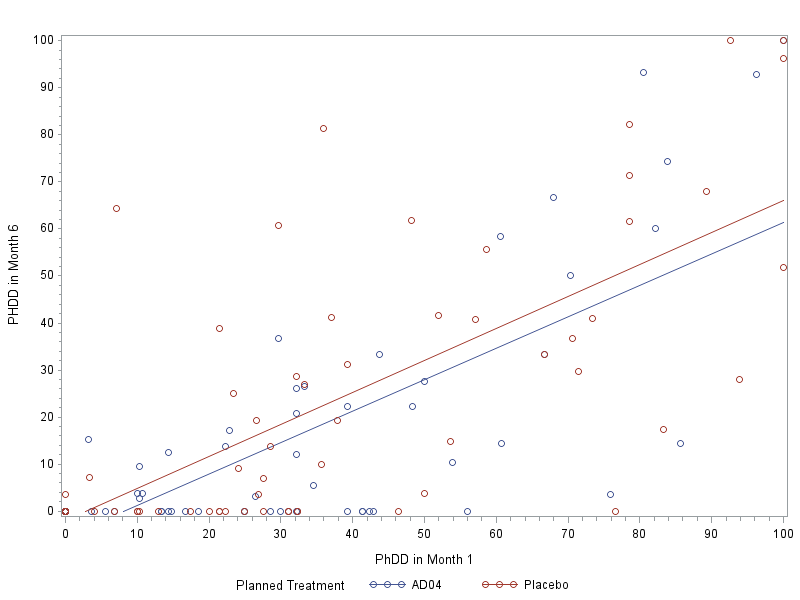


## Severe Heavy Drinkers (> 10 DDD)

We calculated the correlation between PHDD in Month 1 and Month 6: the correlation is 0.61 (p<0.0001). That is, a lower PHDD level in Month 1 is associated with a lower PHDD level in Month 6.

Supplementary Figure 5. Correlational Analysis for PHDD, Severe Heavy Drinkers


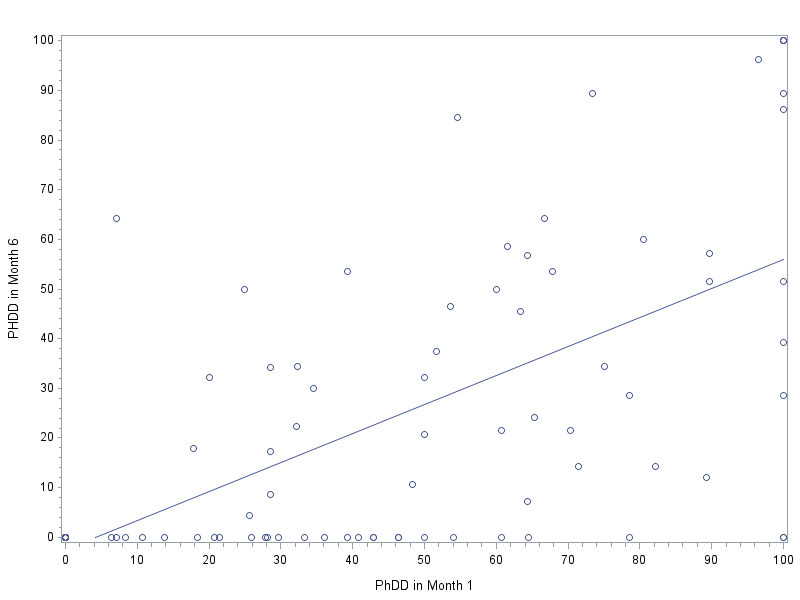


Among the AD04 group, PHDD in Month 1 and Month 6 has a correlation of 0.69 (p<0.0001).

Among the placebo group, PHDD in Month 1 and Month 6 has a correlation of 0.55 (p<0.0001).

To test whether the correlation is the same between the two treatment arms, we did a regression analysis with 3 covariates: PHDD in Month 1, treatment, and their interaction. The correlation can be tested using the interaction term. In the first analysis on the correlation between PHDD in Month 1 and Month 6, the p-value for the interaction term is 0.50. As shown in the figure below, the slopes of the two lines are quite similar.

Supplementary Figure 6. Correlational Analysis for PHDD by Treatment, Severe Heavy Drinkers


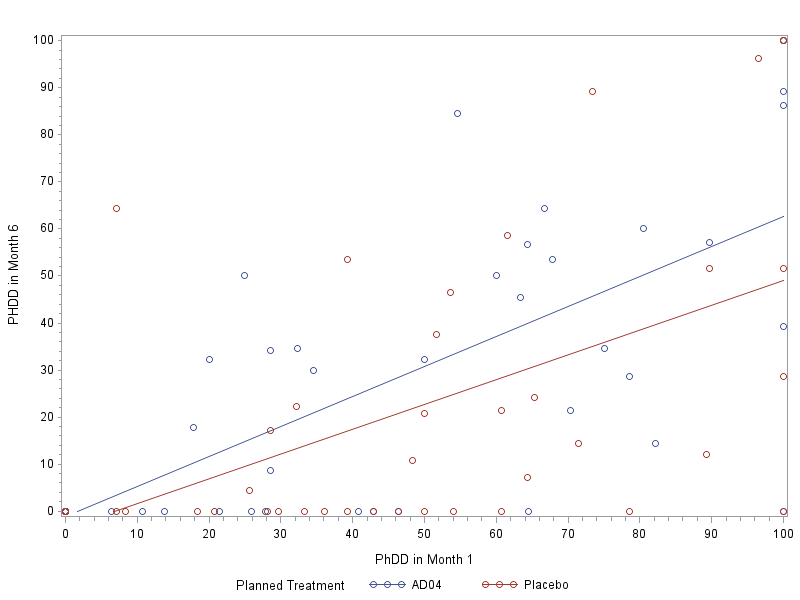

Supplement: Supplementary file 1 [file 26d888d355851c1530f7666d.docx]
